1 **Correspondence:** #To whom correspondence should be addressed: Center of Excellence for  
2 Poultry Science, 1260 W Maple St. O-409, Fayetteville, AR 72701, Ph: 479-575-232, Fax: 479-  
3 575-7139, xiaoluns@uark.edu

4  
5 **Author Contribution:** B. A. and X. S. designed the experiments and wrote the manuscript with  
6 input from co-authors of M.A., Y.M. K., Y. H., and B. H. B.A. performed animal and *in vitro*  
7 experiments and most analysis with the help of co-authors of X. S., H. W., M. A., A.A., and M.  
8 B.

9  
10 **Keywords:** Microbiome, foodborne pathogen, intestine, bacterial colonization, bile acid.

11

12

13

1 **ABSTRACT**

2 Despite reducing the prevalent foodborne pathogen *Campylobacter jejuni* in chickens decreases  
3 campylobacteriosis, few effective approaches are available. The aim of this study was to use  
4 microbial metabolic product bile acids to reduce *C. jejuni* chicken colonization. Broiler chicks  
5 were fed with deoxycholic acid (DCA), lithocholic acid (LCA), or ursodeoxycholic acid  
6 (UDCA). The birds were also transplanted with DCA modulated anaerobes (DCA-Anaero) or  
7 aerobes (DCA-Aero). The birds were infected with human clinical isolate *C. jejuni* 81-176 or  
8 chicken isolate *C. jejuni* AR101. Notably, *C. jejuni* 81-176 was readily colonized intestinal tract  
9 at d16 and reached an almost plateau at d21. Remarkably, DCA excluded *C. jejuni* cecal  
10 colonization at 100, 99.997, and 100% at 16, 21, and 28 days of age. Neither chicken ages of  
11 infection nor LCA or UDCA altered *C. jejuni* AR101 chicken colonization level, while DCA  
12 reduced 91% of the bacterium in chickens at d28. Notably, DCA diet reduced phylum Firmicutes  
13 but increased Bacteroidetes compared to infected control birds. Importantly, DCA-Anaero  
14 attenuated 93% of *C. jejuni* colonization at d28 compared to control infected birds. In  
15 conclusion, DCA shapes microbiota composition against *C. jejuni* colonization in chickens,  
16 suggesting a bidirectional interaction between microbiota and microbial metabolites.

17

## 1 INTRODUCTION

2 *Campylobacter jejuni* asymptomatically colonizes in poultry gut but is one of the  
3 prevalent food borne pathogens in the developed countries. Antibiotic resistant *C. jejuni* has been  
4 reported in children and adults in US and worldwide [1-5]. More than 13 campylobacteriosis  
5 cases per 100,000 population were recorded in 2014 in USA, which represents a 13% increase  
6 compared to 2006-2008 and was higher than the combined incidences by the following 8  
7 bacterial pathogens [6]. A total of 1.3 million individuals are afflicted by the disease, resulting in  
8 76 deaths every year [7]. Although antibiotics treatment has a marginal benefit (1.32 days) on the  
9 duration of campylobacteriosis symptoms [8], it is the only current available therapy for patients  
10 with severe campylobacteriosis or for those at high risk for severe disease [9]. However, ever  
11 increasing antimicrobial resistance [10] prompts the need for immediate and sustainable counter-  
12 actions from agricultural industry to medical field. Misuse or overuse of antimicrobial agents in  
13 medical and agricultural practice is contributing to exacerbating the episodes of emerging  
14 antimicrobial resistant microbes [10]. Hence, an effective and sustainable solution is to find  
15 antimicrobial alternatives in agricultural industry and medical field.

16 Tremendous efforts have been put forward to prevent campylobacteriosis by reducing *C.*  
17 *jejuni* contamination in animal food sources, particularly broiler chicken meat. The intervention  
18 approaches include on-farm biosecurity measures [11], vaccines [12], probiotics [13], phages  
19 [14], and post-slaughter decontamination of poultry carcasses [15]. Reducing carcass  
20 *Campylobacter* counts by 2 log is estimated to decrease a 30-fold in human campylobacteriosis  
21 [16]. Although those measures to prevent *C. jejuni* contamination have achieved some success,  
22 improvement is needed, as evidenced by the relative consistent rate of campylobacteriosis

1 incidences in the Morbidity and Mortality Weekly Report at CDC infectious disease database  
2 from January,1996 to June, 2017 [17].

3 Sparse information is currently available on using microbiota to prevent *C. jejuni*  
4 colonization in poultry. Microbiota transplantation has shown tremendous success against  
5 recurrent *Clostridium difficile* infection [18]. The production of secondary bile acids by specific  
6 bacteria are attributed to inhibit *C. difficile* colonization and infection [19]. Bile acids at 3-30  
7 mM in the human small intestine [20] are the byproducts of cholesterol and biotransformed from  
8 conjugated to unconjugated primary bile acids, and to secondary bile acids. Majority of bile acids  
9 (>95%) are effectively absorbed in intestine [21]. Primary bile acids of cholic acid (CA) and  
10 chenodeoxycholic acid (CDCA) are synthesized from cholesterol in hepatocytes and conjugated  
11 with glycine or taurine [22]. In the intestine, the conjugated primary bile acids are deconjugated  
12 by bacterial bile salt hydrolase (BSH) and further altered by microbiota to produce secondary  
13 bile acids including lithocholic acid (LCA), deoxycholic acid (DCA), and ursodeoxycholic acid  
14 (UDCA). Deconjugating enzyme BSH is present in all major bacterial divisions and archaeal  
15 species in the human gut including members of genus *Lactobacilli*, *Bifidobacteria*, *Clostridium*,  
16 and *Bacteroides* [21,23-25]. Secondary bile acid producing bacteria consist of a small population  
17 of genus *Clostridium*, including *C. scindens*, *C. hiranonis*, *C. hylemonae* (Clostridium cluster  
18 XVIa), and *C. sordelli* (Clostridium cluster XI) [21]. Besides emulsification of lipid for  
19 digestion, bile acids are implicated in various signaling pathways including nuclear receptors of  
20 farnesoid X receptor (FXR) [26], pregnane X receptor (PXR) [27], and vitamin D receptor  
21 (VDR) [28], as well as G protein-coupled receptors of G-protein-coupled bile acid receptor  
22 (TGR5) [29] and sphingosine-1-phosphate receptor 2 (S1P2) [30]. The bile acid-metabolizing  
23 bacteria such as *Lactobacilli* and *Bifidobacteria* are probiotics and they enhance health by

1 promoting host immune homeostasis [31]. Besides bile acids influence host response, their level  
2 is associated with microbial community dynamics in the gut [32]. Bile acids directly inhibit gut  
3 microbes [33] and indirectly modulate microbiota through FXR-induced antimicrobial peptides  
4 [34]. Mice fed CA have increased class Clostridia (70 vs. 39%) compared to control mice, and  
5 genus *Blautia* (including *Ruminococcus* spp. and *Clostridium* cluster XIVa) expands from 8.3 to  
6 55-62% [35]. Bile acids, particularly secondary bile acid DCA, are associated with a variety of  
7 chronic diseases, such as obesity, diabetes, and colorectal tumorigenesis [36,37]. Only very  
8 recently, new evidences shed light on the beneficial property of secondary bile acids in health  
9 and diseases, such as gut motility [38] and *C. difficile* infection [19]. We found that specific  
10 pathogen free (SPF) *Ill10<sup>-/-</sup>* mice resisted against *C. jejuni* 81-176 induced colitis, while the mice  
11 were susceptible to campylobacteriosis after treated with antibiotic clindamycin which kills bile  
12 acid metabolizing bacteria [39]. 16S rDNA sequencing, bioinformatic, and HPLC/MS analysis  
13 showed that clindamycin depleted all secondary bile acids including DCA. Furthermore,  
14 anaerobe metabolite DCA prevents and treats *C. jejuni*-induced colitis in ex-Germ Free mice  
15 [39]. However, it remains unclear whether DCA regulates *C. jejuni* chicken colonization and  
16 transmission.

17 In this study, we hypothesized that DCA prevented *C. jejuni* chicken colonization. Our  
18 data indicate that DCA indeed prevented against chicken colonization of *C. jejuni* human clinical  
19 isolate 81-176 or chicken isolate AR101. Subsequent mechanistic studies found that DCA  
20 modulated intestinal microbiota and DCA-modulated anaerobes attenuated *C. jejuni* chicken  
21 colonization. Thus, the action of DCA against *C. jejuni* chicken colonization represents unique  
22 bidirectional interaction between microbiota and microbial metabolites. It would be more

- 1 effective against campylobacteriosis or the pathogen colonization through modulating both
- 2 microbiota and microbial metabolites.
- 3

## 1 MATERIAL AND METHODS

2

### 3 Chicken experiment

4 Animal experiments performed were in accordance with the Animal Research: Reporting of *In*  
5 *Vivo* Experiments (<https://www.nc3rs.org.uk/arrive-guidelines>). The experiments were approved  
6 by the Care and Use Committee of the University of Arkansas. Cohorts of 13 to 18 one-day-old  
7 broiler chicks obtained from Cobb-Vantress (Siloam Springs, AR) were neck-tagged and  
8 randomly assigned to floor pens with a controlled age-appropriate environment. The birds were  
9 fed a corn-soybean meal-based starter diet during 0-10 days of age and a grower diet during 11-  
10 28 days of age. The basal diet was formulated as described before [40]. Bird were fed diet  
11 supplemented with 0 or 1.5 g/kg DCA, LCA, or UDCA (all from Alfa Aesar) from d 0. Before  
12 experiment, frozen stock of *C. jejuni* 81-176 and AR101 (isolated at Dr. Billy Hargis's lab at  
13 University of Arkansas at Fayetteville) were cultured for 48 hours on *C. jejuni* selective blood  
14 plates with five antibiotics (cefoperazone, cycloheximide, trimethoprim, vancomycin and  
15 polymyxin B). Birds were infected with 10<sup>9</sup> CFU/bird human clinical isolate *C. jejuni* 81-176 at  
16 14 days of age or chicken isolate AR101 at d 5, 10, or 14. Most birds were infected with *C. jejuni*  
17 AR101 at day 10 in order to have enough time for both *C. jejuni* colonization and microbiome  
18 development. Chicken body weight and feed intake were measured at 0, 14, 21, and 28 days of  
19 age. Birds were sacrificed at 16, 21 or 28 days of age to collect cecal samples for enumerating *C.*  
20 *jejuni*. Cecal digesta samples were collected for DNA isolation or were ten-fold serially diluted  
21 with sterile PBS and cultured at 42<sup>0</sup>C for 48 hours under microaerophilic atmosphere. Colonies  
22 were enumerated and CFU per gram was calculated.

### 23 Microbiota transplantation and *C. jejuni* colonization



1 Because *C. jejuni* wasn't detected in cecal digesta samples from 28 days old birds infected with  
2 *C. jejuni* 81-176 and fed 1.5g/kg DCA diet, the samples were used for isolating transplantation  
3 microbiota. Briefly, the cecal content from the birds were quickly squeezed into 50 ml conical  
4 tubes and PBS and glycerol were added. The suspension was homogenized, aliquoted, and stored  
5 in -80 °C freezer. Before experiments, the microbiota stock was cultured on brain heart infusion  
6 (BHI) plates under aerobic or anaerobic conditions for 48 hours at 42°C. The collected bacteria  
7 were labelled as DCA modulated aerobes (DCA-Aero) and DCA modulated Anaerobes (DCA-  
8 Anaero). Chickens were orally gavaged once with 10<sup>8</sup> CFU/bird DCA-Aero or DCA-Anaero at  
9 0 days of age. At 10 days of age, the birds were infected with 10<sup>9</sup> CFU/bird chicken isolate *C.*  
10 *jejuni* AR101. Cecal digesta collected at days 21 and 28 were serially diluted and cultured for *C.*  
11 *jejuni* enumeration as described above.

### 12 ***In vitro* C. jejuni growth with various bile acids**

13 The impact of various species of bile acids on *C. jejuni* growth was measured. Briefly, frozen *C.*  
14 *jejuni* 81-176 or AR101 were cultured on the select plates for 48 hours. *C. jejuni* at 10<sup>3</sup> CFU was  
15 inoculated into 5 ml Campylobacter Enrichment Broth (Neogen Food Safety, MI) in the presence  
16 of DCA, taurocholic acid (TCA), or CA at various concentrations (0, 5, 25 mM) with triplication.  
17 The bacteria were cultured for 24 hours at 42 °C under microaerobic condition. *C. jejuni* growth  
18 was measured by serial dilution and plating on the select plates.

### 19 **Microbiota composition at phylum level**

20 Cecal digesta samples were collected and DNA was extracted using bead beater disruption and  
21 phenol: chloroform separation as describe before [39]. The levels of five phylum bacteria were  
22 determined using SYBR Green PCR Master mix (Bio-Rad) on a Bio-Rad 384-well Real-Time  
23 PCR System. The PCR reactions were performed according to the manufacturer's

1 recommendation. The following gene primers [39,41] were used: Universal 16S: 16s357F: 5'-  
2 CTCCTACGGGGAGGCAGCAA-3', 16s1392R: 5'-ACGGGCGGTGTGTRC-3';  $\alpha$ -  
3 proteobacteria:  $\alpha$ 682F 5'-CIAGTGTAGAGGTGAAATT-3', 908 $\alpha$ R 5'-  
4 CCCC GTCAATTCCTTTGAGTT-3';  $\gamma$ -proteobacteria: 1080 $\gamma$ F 5'-  
5 TCGTCAGCTCGTGTGTGA-3'  $\gamma$ 1202R 5'-CGTAAGGGCCATGATG-3'; Bacteroidetes:  
6 798cfbF 5'-5'-CRAACAGGATTAGATACCCT-3' cfb967R 5'-  
7 GGTAAGGTTCCCTCGCGTAT-3'; Firmicutes: 928F-Firm 5'-  
8 TGAAACTYAAAGGAATTGACG-3' 1040 Firm R 5'-ACCATGCACCACCTGTC-3';  
9 Actinobacteria: Act920F3 5'-TACGGCCGCAAGGCTA-3' Act1200R 5'-  
10 TCRTCCCCACCTTCCTCCG-3'. The relative fold change of each phylum in one sample were  
11 normalized to universal 16S. The percentage of each phylum was then calculated as the phylum  
12 relative folds divided by total folds of all five phyla.

### 13 **Statistical Analysis**

14 Values are shown as mean  $\pm$  standard error of the mean as indicated. Differences between groups  
15 were analyzed using the nonparametric Mann–Whitney *U* test or unpaired t-test with Welch's  
16 correction using Prism 7.0 software similar to previous reports [39,42], because some data were  
17 not under normality. Experiments were considered statistically significant if *P* values were  
18  $<0.05$ .

## 1    **RESULTS**

2

### 3    **DCA prevents *C. jejuni* strain 81-176 cecal colonization in chickens**

4    Secondary bile acid DCA prevents and treats *C. jejuni*-induced intestinal inflammation in germ  
5    free *Ill0<sup>-/-</sup>* mice [39]. Because chickens are the natural reservoir of *C. jejuni*, we then interrogated  
6    the hypothesis that DCA modulated *C. jejuni* colonization in chickens. The birds fed diet  
7    supplemented with 1.5 g/kg DCA were orally infected with a single dose of 10<sup>9</sup> CFU/bird human  
8    clinical isolate *C. jejuni* strain 81-176 at 14 days of age. *C. jejuni* colonization level was determined  
9    by collecting and culturing cecal digesta of the birds at 16, 21, and 28 days of age using *C. jejuni*  
10    select medium. Notably, no *C. jejuni* in cecal digesta was detected from birds without the bacterial  
11    infection, suggesting the clean facility at our chicken farm and the success of strict biosecurity  
12    measurement during our experiments. *C. jejuni* was readily colonized the intestinal tract at a level  
13    of 10<sup>5</sup> CFU/g cecal digesta at 16 days of age, only 2 days post infection (Figure 1). *C. jejuni*  
14    colonization level then increased more than 100 folds and reached an almost plateau of 2.8 x10<sup>7</sup>  
15    CFU/g cecal digesta at 21 days of age. Remarkably, DCA excluded *C. jejuni* cecal colonization at  
16    100, 99.997, and 100% at 16, 21, and 28 days of age compared to the infected control birds. These  
17    results suggest that the secondary bile acid DCA effectively reduces *C. jejuni* 81-176 colonization  
18    in the intestinal tract of broiler chickens.

19

### 20    **DCA promotes bird growth performance**

21    Increased level of secondary bile acids DCA has been associated with obesity [36], but the role of  
22    DCA on animal growth is unclear. To investigate the contribution of DCA on chicken growth, the  
23    bird growth performance of body weight gain was measured at 14 and 28 days of age with or

1 without *C. jejuni* infection. Unlike the outcome of severe intestinal diseases when infecting to  
2 human or mice [43,44], *C. jejuni* infection in chickens neither induced diseases nor reduced the  
3 bird growth performance on body weight gain compared to uninfected birds (Figure 2A).  
4 Remarkably, DCA promoted growth performance of body weight gain by 36.3 % at 14 days of  
5 age, compared to control birds. The body weight gain of birds fed DCA diets posed 12.7% increase  
6 compared to infected control birds at 28 days of age (Figure 2B). Interestingly, *C. jejuni*  
7 colonization increased chicken body weight gain during d 14-28. These findings suggest that DCA  
8 promotes bird growth performance of body weight gain and *C. jejuni* colonization doesn't induce  
9 adverse effect on bird health and growth.

10

#### 11 **DCA fails to inhibit *C. jejuni* 81-176 *in vitro* growth**

12 Since DCA prevented *C. jejuni* colonization in chickens, we then examine whether DCA would  
13 directly inhibit *C. jejuni* 81-176 growth. The bacterium was inoculated in Campylobacter  
14 Enrichment Broth in the presence of different concentrations (0, 5, and 25 mM) of bile acids DCA,  
15 CA, and TCA and cultured at 42°C for 24 hours under microaerobic condition. *C. jejuni* growth  
16 in 5 and 25 mM DCA broth induced gel formation and the OD<sub>600</sub> reading was not accurate,  
17 therefore plate counting was used. Notably, primary bile acid CA at 25 mM reduced *C. jejuni* 81-  
18 176 growth (Figure 3A). Interestingly, conjugated primary bile acid TCA and secondary bile acid  
19 DCA didn't reduce *C. jejuni* 81-176 *in vitro* growth.

20 Our long-term goal is to use microbiome to reduce *C. jejuni* transmission in chickens and to  
21 attenuated transmitted campylobacteriosis using mouse model as reported before [39,44]. Hence,  
22 *C. jejuni* colonized and transmitted in chickens with microbiome treatment is required to be  
23 isolated for subsequently infecting *III0<sup>-/-</sup>* mice. It was problematic when *C. jejuni* 81-176 couldn't

1 be isolated from DCA treated chickens as showed in Figure 1. Different *C. jejuni* strains show  
2 variable colonization ability in chickens [45]. Based on this knowledge, we then assessed the  
3 impact of bile acids on growth of *C. jejuni* strain AR101 which was isolated from chickens at Dr.  
4 Billy Hargis's laboratory. Consistently, only 25 mM CA significantly reduced *C. jejuni* AR101  
5 growth but not TCA or DCA (Figure 3B). Because DCA didn't significantly reduce *C. jejuni* 81-  
6 176 or AR101 *in vitro* growth, it was concluded that DCA against *C. jejuni* chicken colonization  
7 results from factors other than DCA direct inhibition on *C. jejuni* growth.

8

### 9 **Other secondary bile acids don't reduce *C. jejuni* AR101 colonization in chickens**

10 Since DCA reduced *C. jejuni* 81-176 colonization in chickens, it was possible that other secondary  
11 bile acids also decreased the bacterial chicken colonization. To assess this possibility, birds were  
12 fed diets supplemented with 0 or 1.5 g/kg DCA, LCA, or UDCA from d 0. Because the chicken  
13 ages of *C. jejuni* AR101 infection didn't influence its chicken colonization (Supplement Figure 1),  
14 birds were infected once with *C. jejuni* AR101 at d10 instead of d14 to have longer time to interact  
15 with the bile acids. Consistent with previous findings in Figure 1, DCA reduced 91% of *C. jejuni*  
16 AR101 colonization compared to infected control birds ( $2.06 \times 10^6$  vs.  $2.39 \times 10^7$  CFU/g), while LCA  
17 and UDCA failed to decrease AR101 chicken colonization ( $2.05 \times 10^7$  and  $1.40 \times 10^7$  CFU/g,  
18 respectively) (Figure 4). Together, these data suggest that only secondary bile acid DCA  
19 effectively reduces *C. jejuni* chicken colonization.

20

### 21 **DCA modulates bird cecal microbiota**

22 Relative abundance of phylum Firmicutes is dramatically expanded from 54 to 93% in intestine  
23 of rat fed primary bile acid CA [35]. Since DCA neither inhibited *C. jejuni in vitro* growth nor

1 induced intestinal diseases (histopathology, data not shown) in chickens, we then reasoned that  
2 DCA modified microbiota against *C. jejuni* chicken colonization. To examine this hypothesis,  
3 cecal digesta from birds infected with *C. jejuni* 81-176 and fed DCA (Figure 1) were used to  
4 extract DNA. We selected these samples because *C. jejuni* wasn't detected in the samples and the  
5 samples would be used for following experiment of isolating transplantation microbiota. Phylum  
6 specific primers were used to analyze the microbiota composition. Interestingly, *C. jejuni*  
7 infection didn't change microbial composition in microbiota of infected vs. uninfected birds  
8 (Figure 5). Remarkably, DCA reduced phylum Firmicutes (82.7 vs. 98.8%) compared to infected  
9 control birds, while increased Bacteroidetes (16.9 vs. 0.8%). These results indicate that DCA is  
10 able to alter the chicken gut microbiota.

11

### 12 **DCA modulated-anaerobes attenuates *C. jejuni* AR101 chicken colonization**

13

14 Since DCA modulated chicken cecal microbiota, we then hypothesized that the altered  
15 microbiota contributed to the reduction of *C. jejuni* in chickens. In our previous studies, we  
16 found that only anaerobes prevent *C. jejuni*-induced intestinal inflammation in mice [39]. Based  
17 on this knowledge, cecal digesta from the birds fed DCA and infected with *C. jejuni* 81-176 in  
18 Figure 1 were used to culture bacteria on BHI plates under aerobic or anaerobic conditions. The  
19 resulted bacteria were labeled as DCA-modulated aerobes (DCA-Aero) or DCA-modulated  
20 anaerobes (DCA-Anaero), respectively. To functionally dissect the role of these newly isolated  
21 microbiota, birds were gavaged once with DCA-Aero or DCA-Anaero microbiota at 0 day of  
22 age. The birds were then infected with  $10^9$  CFU/bird *C. jejuni* AR101 at 10 days of age.  
23 Consistent with previous observations, *C. jejuni* colonization in chicken ceca reached a plateau at

1 a level of  $2.80 \times 10^7$  CFU/g cecal digesta at 21 days of age (Figure 6A), or 11 days post infection.  
2 Importantly, DCA-Anaero significantly attenuated 93% of *C. jejuni* cecal colonization at 28 days  
3 of age compared to infected control birds ( $1.79 \times 10^6$  vs.  $2.52 \times 10^7$  CFU/bird), while DCA-Aero  
4 only reduced 34.46% of *C. jejuni* ( $1.65 \times 10^7$  vs.  $2.52 \times 10^7$ ) colonization. To examine if the  
5 transplanted microbiota colonized the chickens, cecal samples from the birds were collected.  
6 DNA was extracted and phylum level PCR was performed. Consistent with the inoculum DCA  
7 microbiota, the microbiota of DCA-Anaero birds showed increased Bacteroidetes (23.6 vs.  
8 3.8%) but reduced Firmicutes (76.3 vs. 95.8%) compared to infected control birds (Figure 6B),  
9 while DCA-Aero birds shared similar microbiota composition to infected control birds. These  
10 data supported the notion of our successful DCA microbiota collection, inoculation, and chicken  
11 colonization. Taken together, these findings suggest that DCA modulates microbiota and the  
12 modulated anaerobes contribute to the reduction of *C. jejuni* colonization in chickens.

## 1 DISCUSSION

2 Although *C. jejuni* is one of the prevalent foodborne pathogens in developed countries, a paucity  
3 of information is available regarding reducing the pathogen in the main food animal source of  
4 chickens. Moreover, the microbiota and cellular events implicated in host  
5 resistance/susceptibility to *C. jejuni* infection remain elusive [46,47]. Here we report that  
6 microbial metabolic product DCA prevented colonization of both human clinical isolate *C. jejuni*  
7 81-176 and chicken isolate AR101 in chickens. Interestingly, bile acids of DCA, TCA, or low  
8 concentration CA failed to reduce *C. jejuni in vitro* growth. Furthermore, neither bird ages of *C.*  
9 *jejuni* infection at d 5, 10 or 14, nor other bile acids of LCA or UDCA influenced the bacterial  
10 chicken colonization levels. Mechanistic studies revealed that DCA modified chicken cecal  
11 microbiota with increased phylum Bacteroidetes and reduced Firmicutes. Importantly, DCA-  
12 modulated anaerobes prevented *C. jejuni* chicken colonization. Altogether, these findings  
13 identified a novel mechanism that DCA shapes microbiota composition against *C. jejuni*  
14 colonization in chickens, suggesting a bidirectional interaction between microbiota and microbial  
15 metabolites.

16 A remarkable observation from our study is that DCA but not LCA or UDCA prevented  
17 *C. jejuni* colonization in chickens. The logic reasoning would be that the reduction would be  
18 through DCA directly impairing *C. jejuni* growth. DCA at 1.2 mM inhibits *C. jejuni* 81-176 *in*  
19 *vitro* growth after 12 hour incubation [48] but Lin and colleague found that the MICs of DCA  
20 and CA for *C. jejuni* 81-176 are 24 and 14 mM, respectively [49]. Interestingly, DCA at 48 mM  
21 fails to reduce *C. jejuni* 43431 growth at 6, 22, 25 and 30 hours of incubation but not at 16 hours  
22 [50]. Consistent with the latter reports, we found that conjugated primary bile acid TCA or  
23 secondary bile acid DCA at as high as 25 mM didn't significantly inhibit *C. jejuni* 81-176 or



1 AR101 *in vitro* growth. Consistent with Lin's report [49], CA at 25 mM significantly reduced *C.*  
2 *jejuni in vitro* growth, suggesting a potential to manipulate this bile acid against *C. jejuni* chicken  
3 colonization. In animals, DCA reduces *C. jejuni* induced intestinal inflammation in ex-Germ  
4 Free mice without altering *C. jejuni* colonization level in colon [39]. Together, the knowledge  
5 and data suggest that DCA reduces *C. jejuni* colonization possibly through mechanisms other  
6 than directly inhibiting the bacterial growth.

7         Comprehensive database analysis showed that chicken microbiota at phylum level is  
8 mainly comprised of 13 phyla including Firmicutes (70%), Bacteroidetes (12.3%),  
9 Proteobacteria (9.3%) , and other small proportion of Actinobacteria, Cyanobacteria,  
10 Spirochaetes, Synergistetes, Fusobacteria, Tenericutes, and Verrucomicrobia [51]. Our phylum  
11 level analysis of microbiota has found that birds fed DCA were colonized with reduced  
12 Firmicutes (82.7 vs. 98.8%) and increased Bacteroidetes (16.9 vs. 0.8%), which is associated  
13 with less *C. jejuni* colonization compared to control infected birds. Notably, this finding is  
14 consistent with a field survey report that birds from the farm with the highest *Campylobacter*  
15 counts are associated with the highest percentage of Firmicutes and the lowest percentage of  
16 Bacteroidetes, although microbiota composition is highly variable between inter- or intra-farms  
17 [52]. Interestingly, the microbiota in mice fed CA expands phylum Firmicutes (54 to 99%), class  
18 Clostridia (70 to 39%), and genus *Blautia* (8.3 to 55-62%), in the expense of phylum  
19 Bacteroidetes (30 to 0.39%) [35]. The levels of bile acids are associated with microbial  
20 community dynamics in the gut [32]. Bile acids directly inhibit gut microbes [33] and ileal  
21 bacterial overgrowth through FXR-induced antimicrobial peptides [34]. However, it remains  
22 elusive how various bile acid species differentially influence intestinal microbiota composition.

1 In the future, we will investigate the microbiota composition using 16S rDNA sequencing in  
2 birds fed DCA, LCA, and UDCA.

3 Based on the results of DCA altering microbiota, we hypothesized that the microbiota  
4 played roles on protecting against *C. jejuni* chicken colonization. To functionally dissect the  
5 protection of the DCA-modulated microbiota, microbiota culture and chicken microbiota  
6 transplantation were performed. Indeed, DCA modulated anaerobes reduced *C. jejuni* chicken  
7 colonization, while DCA modulated aerobes failed to do so. Phylum level microbiota  
8 composition analysis by real time PCR strongly support the successful microbiota collection,  
9 inoculation and chicken colonization. Microbiota prevents against *C. jejuni* chicken colonization  
10 because *C. jejuni* colonizes at higher level in germ free or antibiotics pre-treated chickens  
11 compared to conventional birds [53]. Specific members of microbiota play an important role  
12 against *C. jejuni* induced diseases. Microbiota diversity and the relative abundances of genera  
13 Dorea and Coprococcus in family Lachnospiraceae were higher in healthy travelers compared to  
14 individuals suffered with campylobacteriosis [47]. Mouse microbiota with higher level of genera  
15 *Clostridium XI*, *Bifidobacterium*, and *Lactobacillus* is associated with resistance to *C. jejuni*  
16 induced colitis [39]. The three genera bacteria metabolize conjugated bile acids into secondary  
17 forms [21] which prevent campylobacteriosis in mice [39]. Interestingly, probiotics  
18 *Bifidobacterium longum* PCB133 and a xylo-oligosaccharide fail to reduce *C. jejuni* chicken  
19 colonization using plate enumeration [54]. We are processing the cecal samples to extract  
20 bacterial DNA to run 16S rDNA sequencing and we expect that we will find specific bacteria in  
21 DCA-modulated anaerobes responsible for protection against *C. jejuni* chicken colonization.

22 Finally, we found that *C. jejuni* colonization levels was independent on the ages of birds  
23 infected. It remains controversial whether chicken ages of inflection play any role on *C. jejuni*

1 chicken colonization. *C. jejuni* is detected in 40% of broiler chicken flocks at 4 weeks of age and  
2 in 90% of flocks at 7 weeks of age [55]. This infection pattern could be attributed to age-related  
3 resistance or the necessary timing for *C. jejuni* transmission within house. Birds from parent  
4 breeders colonized with high level *C. jejuni* strain 99/308 are resistant to 99/308 only at 8 days of  
5 age but not at 1 or 22 days of age [56], suggesting specific and limited protection from the  
6 breeders. However, Han and colleagues showed that *C. jejuni* strains Lior6 and 0097 colonize  
7 less in birds of d 22 compared to d 1, after 14 days post infection [49]. Because bird microbiota  
8 starts to assemble after hatch, the older birds in some farms might develop microbiota resistant to  
9 *C. jejuni*, as in Han and colleagues' report [49]. Similarly, germ free mice transferred to SPF  
10 housing for 14 days resist against *C. jejuni* induced colitis [39]. In those research reports  
11 showing no age difference on *C. jejuni* bird colonization, the resistant microbiota assembly in the  
12 birds might be blocked by strict biosecurity measurements or no available resistant microbiota in  
13 the environment.

14 In conclusion, the microbiota metabolite secondary bile acid DCA decreases *C. jejuni*  
15 counts and modulates microbiota composition in the chicken intestine. At mechanistic level,  
16 DCA-modulated anaerobic microbiota may be responsible for protecting against *C. jejuni*  
17 colonization in chickens. These findings identified a novel mechanism that DCA shapes  
18 microbiota composition against *C. jejuni* colonization in chickens, suggesting a bidirectional  
19 interaction between microbiota and microbial metabolites. Simultaneously reconstituting both  
20 microbiota and microbial metabolites may render better therapeutic effect against  
21 campylobacteriosis or the pathogen colonization.

## 1 Reference

- 2 1. Pham NT, Thongprachum A, Tran DN, Nishimura S, Shimizu-Onda Y, et al. (2016) Antibiotic Resistance  
3 of *Campylobacter jejuni* and *C. coli* Isolated from Children with Diarrhea in Thailand and Japan.  
4 *Jpn J Infect Dis* 69: 77-79.
- 5 2. Bae J, Oh E, Jeon B (2014) Enhanced transmission of antibiotic resistance in *Campylobacter jejuni*  
6 biofilms by natural transformation. *Antimicrob Agents Chemother* 58: 7573-7575.
- 7 3. Hou FQ, Sun XT, Wang GQ (2012) Clinical manifestations of *Campylobacter jejuni* infection in  
8 adolescents and adults, and change in antibiotic resistance of the pathogen over the past 16  
9 years. *Scand J Infect Dis* 44: 439-443.
- 10 4. Szczepanska B, Kaminski P, Andrzejewska M, Spica D, Kartanas E, et al. (2015) Prevalence, virulence,  
11 and antimicrobial resistance of *Campylobacter jejuni* and *Campylobacter coli* in white stork  
12 *Ciconia ciconia* in Poland. *Foodborne Pathog Dis* 12: 24-31.
- 13 5. Zhao S, Mukherjee S, Chen Y, Li C, Young S, et al. (2015) Novel gentamicin resistance genes in  
14 *Campylobacter* isolated from humans and retail meats in the USA. *J Antimicrob Chemother* 70:  
15 1314-1321.
- 16 6. CDC (2018) Foodborne Diseases Active Surveillance Network (FoodNet) Fast. Centers for Disease  
17 Control and Prevention. <https://wwwn.cdc.gov/foodnetfast/>.
- 18 7. CDC (2014) *Campylobacter* general inflammation.
- 19 8. Ternhag A, Asikainen T, Giesecke J, Ekdahl K (2007) A meta-analysis on the effects of antibiotic  
20 treatment on duration of symptoms caused by infection with *Campylobacter* species. *Clin Infect*  
21 *Dis* 44: 696-700.
- 22 9. CDC (2010) *Campylobacter*: General Information. Available at  
23 <http://www.cdc.gov/nczved/divisions/dfbmd/diseases/campylobacter/>. Accessed October 19,  
24 2010.
- 25 10. Neu HC (1992) The crisis in antibiotic resistance. *Science* 257: 1064-1073.
- 26 11. Gibbens JC, Pascoe SJ, Evans SJ, Davies RH, Sayers AR (2001) A trial of biosecurity as a means to  
27 control *Campylobacter* infection of broiler chickens. *Prev Vet Med* 48: 85-99.
- 28 12. Hodgins DC, Barjesteh N, St Paul M, Ma Z, Monteiro MA, et al. (2015) Evaluation of a polysaccharide  
29 conjugate vaccine to reduce colonization by *Campylobacter jejuni* in broiler chickens. *BMC Res*  
30 *Notes* 8: 204.
- 31 13. Aguiar VF, Donoghue AM, Arsi K, Reyes-Herrera I, Metcalf JH, et al. (2013) Targeting motility  
32 properties of bacteria in the development of probiotic cultures against *Campylobacter jejuni* in  
33 broiler chickens. *Foodborne Pathog Dis* 10: 435-441.
- 34 14. Kittler S, Fischer S, Abdulmawjood A, Glunder G, Klein G (2014) Colonisation of a phage susceptible  
35 *Campylobacter jejuni* population in two phage positive broiler flocks. *PLoS One* 9: e94782.
- 36 15. Hertwig S, Hammerl JA, Appel B, Alter T (2013) Post-harvest application of lytic bacteriophages for  
37 biocontrol of foodborne pathogens and spoilage bacteria. *Berl Munch Tierarztl Wochenschr* 126:  
38 357-369.
- 39 16. Rosenquist H, Nielsen NL, Sommer HM, Norrung B, Christensen BB (2003) Quantitative risk  
40 assessment of human campylobacteriosis associated with thermophilic *Campylobacter* species  
41 in chickens. *Int J Food Microbiol* 83: 87-103.
- 42 17. CDC (1996-2016) Morbidity and Mortality Weekly Report at  
43 <https://wonder.cdc.gov/mmwr/mmwmort.asp>.
- 44 18. Silverman MS, Davis I, Pillai DR (2010) Success of self-administered home fecal transplantation for  
45 chronic *Clostridium difficile* infection. *Clin Gastroenterol Hepatol* 8: 471-473.

- 1 19. Buffie CG, Bucci V, Stein RR, McKenney PT, Ling L, et al. (2015) Precision microbiome reconstitution  
2 restores bile acid mediated resistance to *Clostridium difficile*. *Nature* 517: 205-208.
- 3 20. Darkoh C, Lichtenberger LM, Ajami N, Dial EJ, Jiang ZD, et al. (2010) Bile acids improve the  
4 antimicrobial effect of rifaximin. *Antimicrob Agents Chemother* 54: 3618-3624.
- 5 21. Ridlon JM, Kang DJ, Hylemon PB (2006) Bile salt biotransformations by human intestinal bacteria. *J*  
6 *Lipid Res* 47: 241-259.
- 7 22. Chiang JY (2004) Regulation of bile acid synthesis: pathways, nuclear receptors, and mechanisms. *J*  
8 *Hepatol* 40: 539-551.
- 9 23. Archer RH, Chong R, Maddox IS (1982) Hydrolysis of bile acid conjugates by *Clostridium*  
10 *bifermentans*. *European journal of applied microbiology and biotechnology* 14: 41-45.
- 11 24. Gilliland SE, Speck ML (1977) Deconjugation of bile acids by intestinal lactobacilli. *Appl Environ*  
12 *Microbiol* 33: 15-18.
- 13 25. Jones BV, Begley M, Hill C, Gahan CG, Marchesi JR (2008) Functional and comparative metagenomic  
14 analysis of bile salt hydrolase activity in the human gut microbiome. *Proc Natl Acad Sci U S A*  
15 105: 13580-13585.
- 16 26. Wang H, Chen J, Hollister K, Sowers LC, Forman BM (1999) Endogenous bile acids are ligands for the  
17 nuclear receptor FXR/BAR. *Mol Cell* 3: 543-553.
- 18 27. Xie W, Radominska-Pandya A, Shi Y, Simon CM, Nelson MC, et al. (2001) An essential role for nuclear  
19 receptors SXR/PXR in detoxification of cholestatic bile acids. *Proc Natl Acad Sci U S A* 98: 3375-  
20 3380.
- 21 28. Makishima M, Lu TT, Xie W, Whitfield GK, Domoto H, et al. (2002) Vitamin D receptor as an intestinal  
22 bile acid sensor. *Science* 296: 1313-1316.
- 23 29. Maruyama T, Miyamoto Y, Nakamura T, Tamai Y, Okada H, et al. (2002) Identification of membrane-  
24 type receptor for bile acids (M-BAR). *Biochem Biophys Res Commun* 298: 714-719.
- 25 30. Studer E, Zhou X, Zhao R, Wang Y, Takabe K, et al. (2012) Conjugated bile acids activate the  
26 sphingosine-1-phosphate receptor 2 in primary rodent hepatocytes. *Hepatology* 55: 267-276.
- 27 31. Vlasova AN, Chattha KS, Kandasamy S, Liu Z, Esseili M, et al. (2013) Lactobacilli and bifidobacteria  
28 promote immune homeostasis by modulating innate immune responses to human rotavirus in  
29 neonatal gnotobiotic pigs. *PLoS One* 8: e76962.
- 30 32. Ridlon JM, Kang DJ, Hylemon PB, Bajaj JS (2014) Bile acids and the gut microbiome. *Curr Opin*  
31 *Gastroenterol* 30: 332-338.
- 32 33. Begley M, Gahan CG, Hill C (2005) The interaction between bacteria and bile. *FEMS Microbiol Rev* 29:  
33 625-651.
- 34 34. Inagaki T, Moschetta A, Lee YK, Peng L, Zhao G, et al. (2006) Regulation of antibacterial defense in  
35 the small intestine by the nuclear bile acid receptor. *Proc Natl Acad Sci U S A* 103: 3920-3925.
- 36 35. Islam KB, Fukiya S, Hagio M, Fujii N, Ishizuka S, et al. (2011) Bile acid is a host factor that regulates  
37 the composition of the cecal microbiota in rats. *Gastroenterology* 141: 1773-1781.
- 38 36. Ma H, Patti ME (2014) Bile acids, obesity, and the metabolic syndrome. *Best Pract Res Clin*  
39 *Gastroenterol* 28: 573-583.
- 40 37. Bernstein C, Holubec H, Bhattacharyya AK, Nguyen H, Payne CM, et al. (2011) Carcinogenicity of  
41 deoxycholate, a secondary bile acid. *Arch Toxicol* 85: 863-871.
- 42 38. Yano JM, Yu K, Donaldson GP, Shastri GG, Ann P, et al. (2015) Indigenous bacteria from the gut  
43 microbiota regulate host serotonin biosynthesis. *Cell* 161: 264-276.
- 44 39. Sun X, Winglee K, Gharaibeh RZ, Gauthier J, He Z, et al. (2018) Microbiota-Derived Metabolic Factors  
45 Reduce *Campylobacteriosis* in Mice. *Gastroenterology* 154: 1751-1763 e1752.
- 46 40. Galarza-Seeber R, Latorre JD, Bielke LR, Kuttappan VA, Wolfenden AD, et al. (2016) Leaky Gut and  
47 Mycotoxins: Aflatoxin B1 Does Not Increase Gut Permeability in Broiler Chickens. *Front Vet Sci* 3:  
48 10.

- 1 41. Bacchetti De Gregoris T, Aldred N, Clare AS, Burgess JG (2011) Improvement of phylum- and class-  
2 specific primers for real-time PCR quantification of bacterial taxa. *J Microbiol Methods* 86: 351-  
3 356.
- 4 42. Sun X, Threadgill D, Jobin C (2012) *Campylobacter jejuni* induces colitis through activation of  
5 mammalian target of rapamycin signaling. *Gastroenterology* 142: 86-95 e85.
- 6 43. van Spreeuwel JP, Duursma GC, Meijer CJ, Bax R, Rosekrans PC, et al. (1985) *Campylobacter colitis*:  
7 histological immunohistochemical and ultrastructural findings. *Gut* 26: 945-951.
- 8 44. Lippert E, Karrasch T, Sun X, Allard B, Herfarth HH, et al. (2009) Gnotobiotic IL-10; NF-kappaB mice  
9 develop rapid and severe colitis following *Campylobacter jejuni* infection. *PLoS One* 4: e7413.
- 10 45. Pielsticker C, Glunder G, Rautenschlein S (2012) Colonization properties of *Campylobacter jejuni* in  
11 chickens. *Eur J Microbiol Immunol (Bp)* 2: 61-65.
- 12 46. Luethy PM, Huynh S, Ribardo DA, Winter SE, Parker CT, et al. (2017) Microbiota-Derived Short-Chain  
13 Fatty Acids Modulate Expression of *Campylobacter jejuni* Determinants Required for  
14 Commensalism and Virulence. *MBio* 8.
- 15 47. Kampmann C, Dicksved J, Engstrand L, Rautelin H (2016) Composition of human faecal microbiota in  
16 resistance to *Campylobacter* infection. *Clin Microbiol Infect* 22: 61 e61-61 e68.
- 17 48. Negretti NM, Gourley CR, Clair G, Adkins JN, Konkel ME (2017) The food-borne pathogen  
18 *Campylobacter jejuni* responds to the bile salt deoxycholate with countermeasures to reactive  
19 oxygen species. *Sci Rep* 7: 15455.
- 20 49. Han Z, Pielsticker C, Gerzova L, Rychlik I, Rautenschlein S (2016) The influence of age on  
21 *Campylobacter jejuni* infection in chicken. *Dev Comp Immunol* 62: 58-71.
- 22 50. Lertpiriyapong K, Gamazon ER, Feng Y, Park DS, Pang J, et al. (2012) *Campylobacter jejuni* type VI  
23 secretion system: roles in adaptation to deoxycholic acid, host cell adherence, invasion, and in  
24 vivo colonization. *PLoS One* 7: e42842.
- 25 51. Wei S, Morrison M, Yu Z (2013) Bacterial census of poultry intestinal microbiome. *Poult Sci* 92: 671-  
26 683.
- 27 52. Sakaridis I, Ellis RJ, Cawthraw SA, van Vliet AHM, Stekel DJ, et al. (2018) Investigating the Association  
28 Between the Caecal Microbiomes of Broilers and *Campylobacter* Burden. *Front Microbiol* 9: 927.
- 29 53. Han Z, Willer T, Li L, Pielsticker C, Rychlik I, et al. (2017) Influence of the Gut Microbiota Composition  
30 on *Campylobacter jejuni* Colonization in Chickens. *Infect Immun* 85.
- 31 54. Baffoni L, Gaggia F, Garofolo G, Di Serafino G, Buglione E, et al. (2017) Evidence of *Campylobacter*  
32 *jejuni* reduction in broilers with early synbiotic administration. *Int J Food Microbiol* 251: 41-47.
- 33 55. Evans SJ, Sayers AR (2000) A longitudinal study of *campylobacter* infection of broiler flocks in Great  
34 Britain. *Prev Vet Med* 46: 209-223.
- 35 56. Cawthraw SA, Newell DG (2010) Investigation of the presence and protective effects of maternal  
36 antibodies against *Campylobacter jejuni* in chickens. *Avian Dis* 54: 86-93.

37

1 **Figure legends**

2

3 **Figure 1. DCA prevents against *C. jejuni* strain 81-176 colonization in chickens.** Cohorts of 13  
4 one-day-old broiler chickens were fed 0 or 1.5 g/kg DCA diets. The birds were infected with *C.*  
5 *jejuni* 81-176 at 14 days of age. Cecal digesta were collected at 16, 21, and 28 days of age, serially  
6 diluted, and cultured on *C. jejuni* selective medium at 42 °C. *C. jejuni* was counted after 48 hours  
7 of culture. All graphs depict mean ± SEM. Significant if P<0.05. Results are representative of 2  
8 independent experiments.

9

10 **Figure 2. DCA promotes broiler chicken growth performance.** Cohorts of 13 birds were fed  
11 DCA diet and infected with *C. jejuni* as described in Figure 1. (A) Periodic bird growth  
12 performance of body weight gain. (B) Accumulative body weight gain at 28 days of age. All graphs  
13 depict mean ± SEM. Significant if P<0.05. Results are representative of 2 independent  
14 experiments.

15

16 **Figure 3. Bile acids fail to inhibit *C. jejuni* *in vitro* growth.**

17 *C. jejuni* 81-176 or AR101 at 10<sup>3</sup> CFU was inoculated into 5 ml *Campylobacter* broth under  
18 microaerophilic condition and cultured at 42 °C for 24 hours. The broth was supplemented with  
19 various concentrations (0, 5, or 25 mM) of secondary bile acid DCA, primary bile acid CA, or  
20 conjugated primary bile acid TCA. (A) Bile acids on 81-176 growth. (B) Bile acids on AR101  
21 growth. Different letters represent significance (P<0.05) between treatments. Results are  
22 representative of 3 independent experiments.

23



1 **Figure 4. LCA and UDCA fail to prevent *C. jejuni* colonization in chickens.**

2 Cohorts of 18 chicks were fed diets supplemented with 0 or 1.5 g/kg of DCA, UDCA, or LCA.  
3 and were infected with *C. jejuni* AR 101 at day 10 of age. All birds were sacrificed and cecal  
4 digesta were collected at 28 days of age, serially diluted, and cultured on *C. jejuni* selective  
5 medium at 42 °C. *C. jejuni* was counted after 48 hours. All graphs depict mean ± SEM. Significant  
6 if P<0.05. Results are representative of 2 independent experiments.

7  
8 **Figure 5. DCA modulates cecal microbiota.**

9 Cohorts of 13 chicks were fed 0 or 1.5 g/kg DCA diets and infected with *C. jejuni* 81-176 as  
10 described in Figure 1. Cecal digesta samples were collected and DNA was isolated. Real time PCR  
11 was performed to calculate bacterial composition at phylum level. All graphs depict mean ± SEM.  
12 \*, P<0.05. Results are representative of 2 independent experiments.

13  
14 **Figure 6. DCA-modulated microbiota attenuates *C. jejuni* colonization in chickens.**

15 Cohorts of 18 broiler chickens were orally transplanted with 10<sup>8</sup> CFU/bird DCA-Aero or DCA-  
16 Anaero at d 0. The birds were then infected with 10<sup>9</sup> CFU/bird *C. jejuni* AR 101 at 10 days of age.  
17 Cecal digesta were collected at 21 and 28 days of age, serially diluted, and cultured on *C. jejuni*  
18 selective medium at 42 °C. *C. jejuni* was counted after 48 hours. (A) *C. jejuni* cecal colonization.  
19 (B) Cecal microbiota composition at d28 at phylum level. \*, P<0.05 between DCA-Anaero and  
20 infected control birds. All graphs depict mean ± SEM.; significant if P<0.05. Results are  
21 representative of 3 independent experiments.

22



1 **Supplemental Figure 1. Chicken ages of infection don't influence the bacterial colonization**  
2 **levels.**

3 Cohorts of 18 one-day-old broiler chicks were fed basal diet and orally gavaged with  $10^9$  CFU of  
4 *C. jejuni* AR 101 at 5, 10, or 14 days of age. At d 28, birds were humanely sacrificed and cecal  
5 samples were collected. Cecal digesta samples were serially diluted and cultured on  
6 *Campylobacter* selective media. Colonies were enumerated and *C. jejuni* colonization levels were  
7 calculated. All graphs depict mean  $\pm$  SEM. Results are representative of 2 independent  
8 experiments.

# Figure 1. DCA prevents against *C. jejuni* 81-176 colonization in chickens

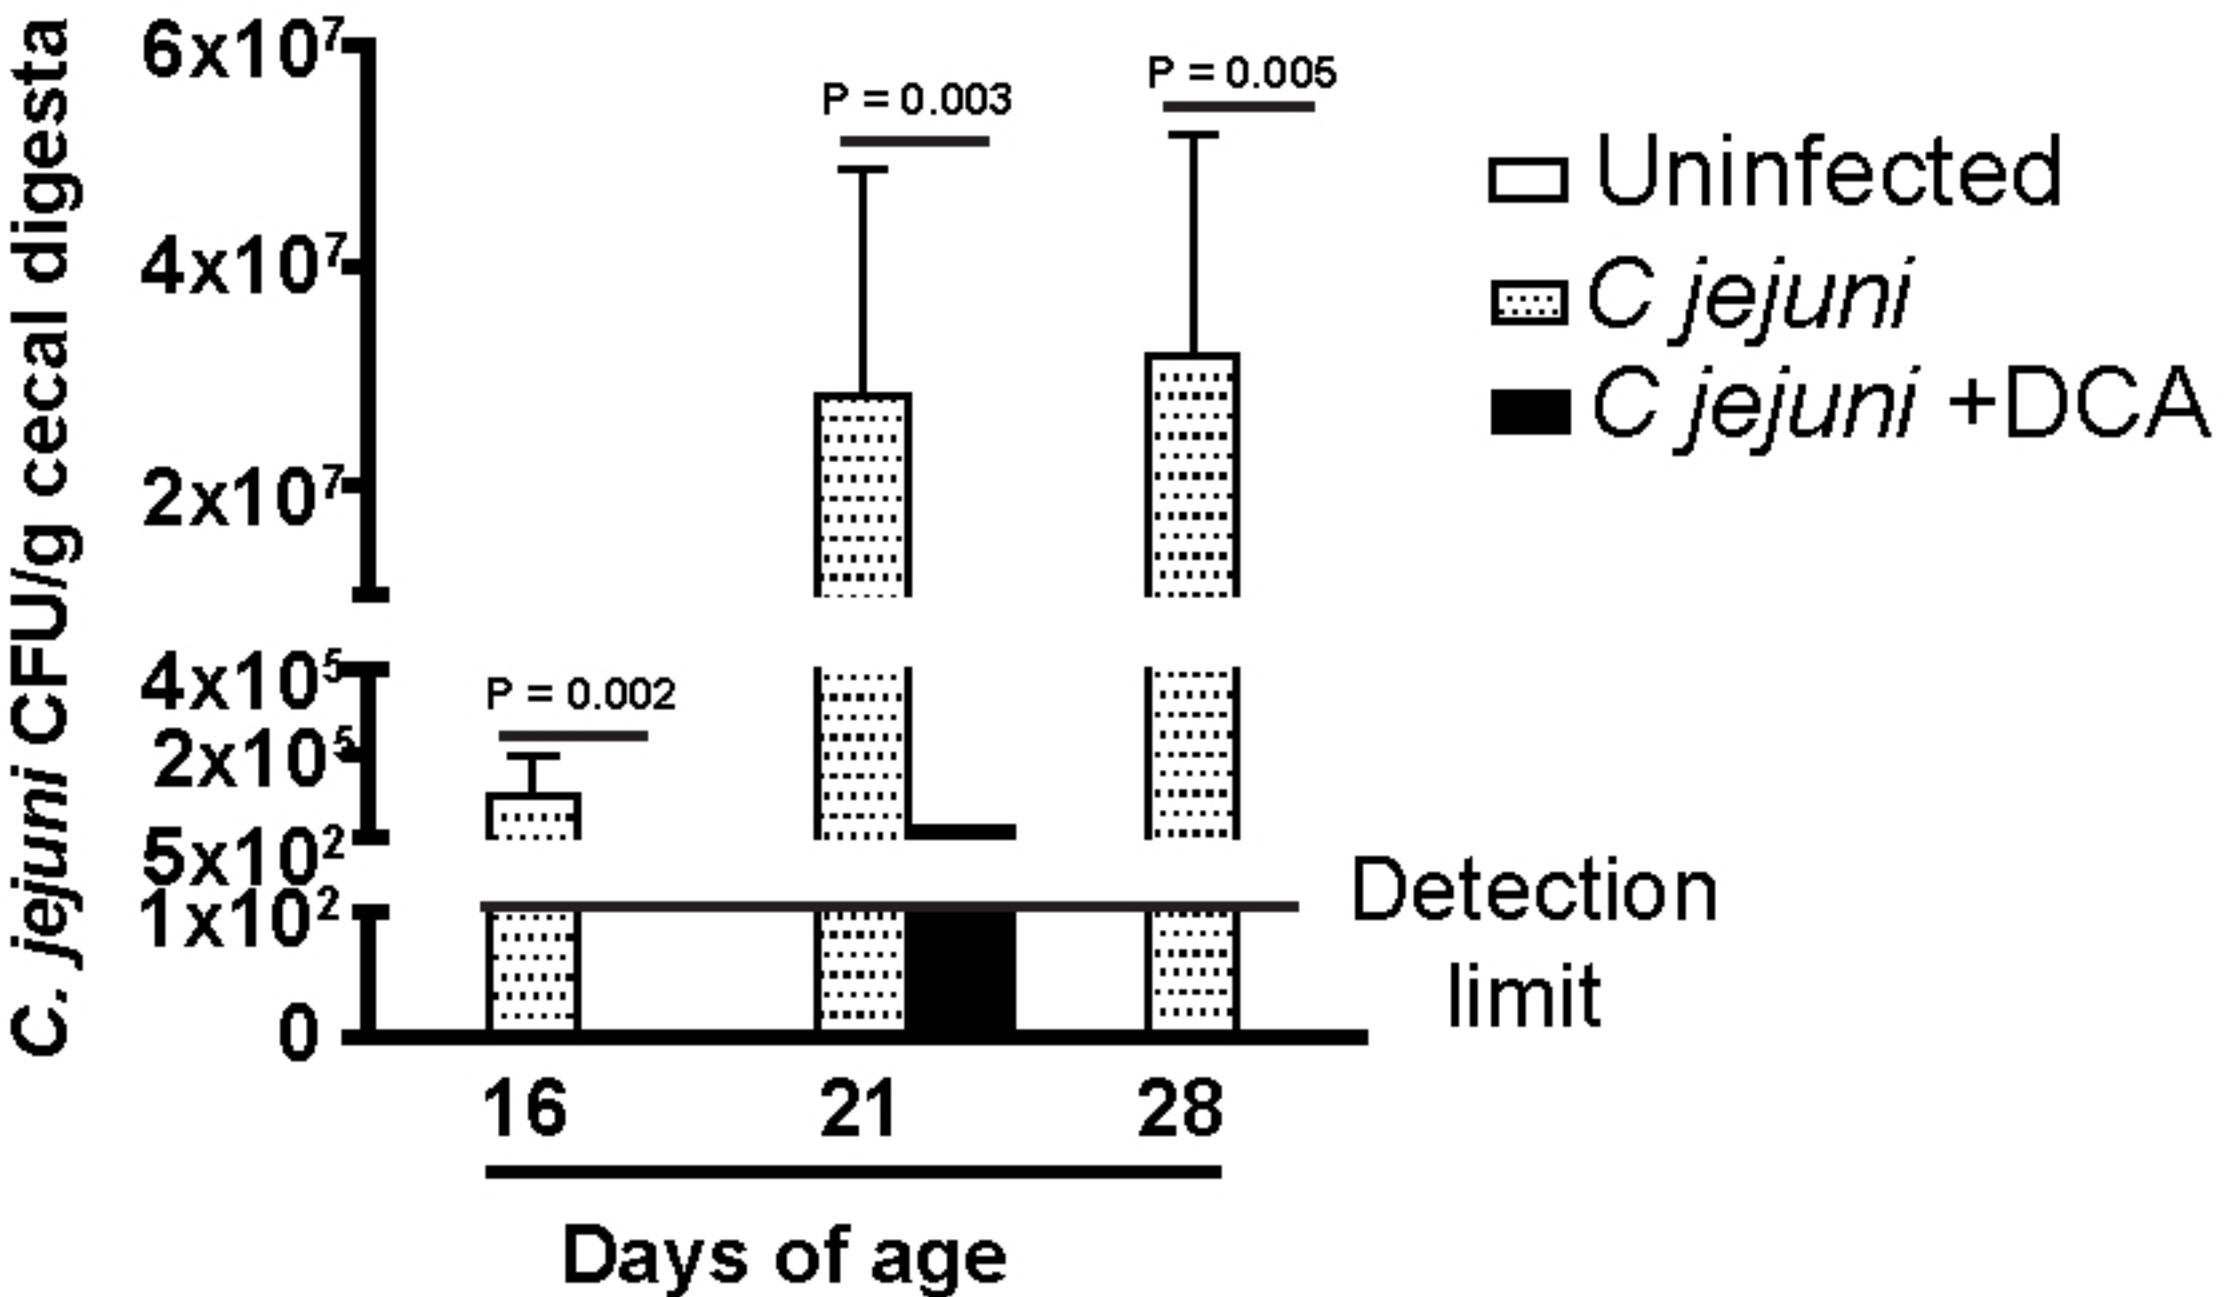

Figure 1

# Figure 2. DCA promotes broiler growth performance

□ Uninfected    ▨ *C jejuni*    ■ *C jejuni* + DCA

## A.

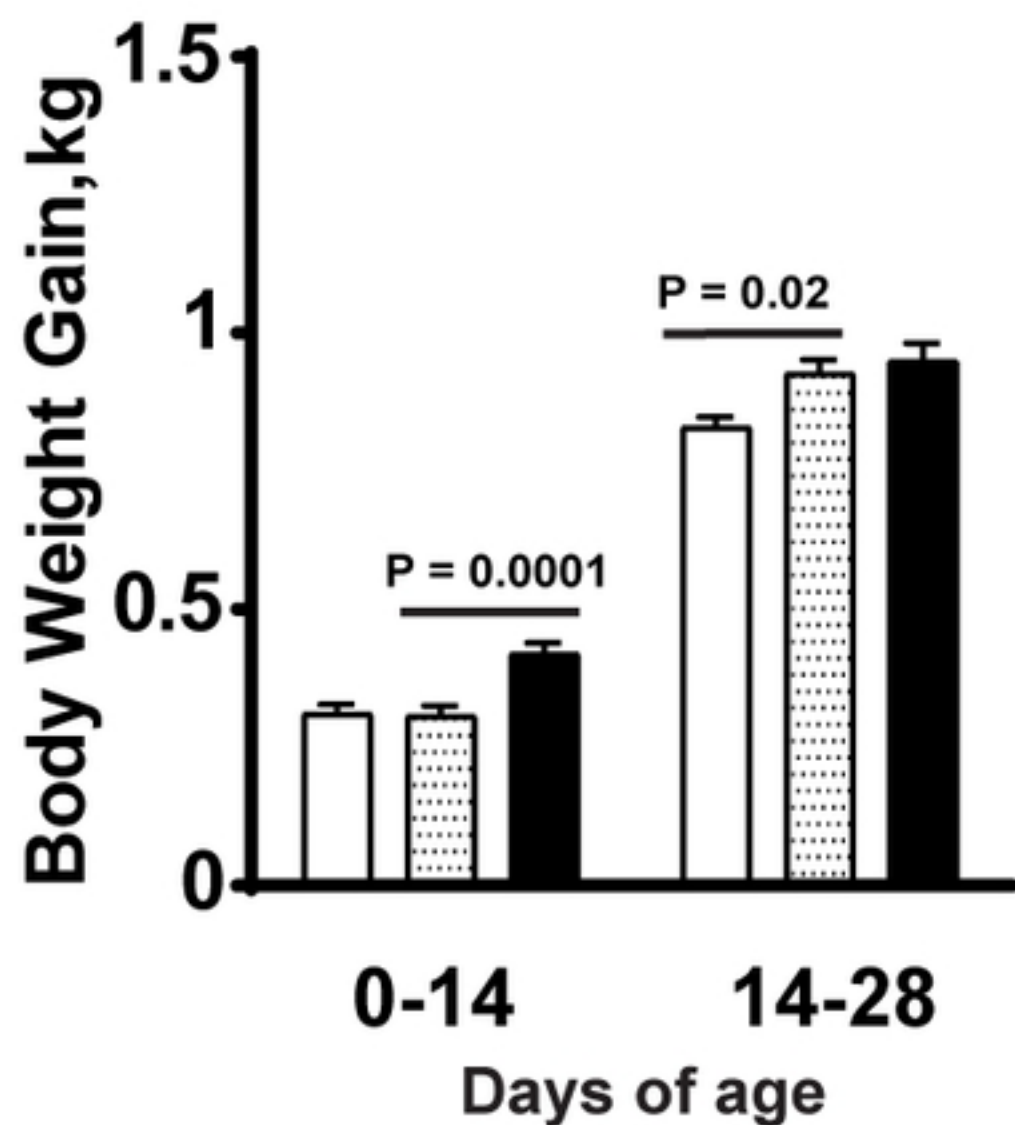

## B.

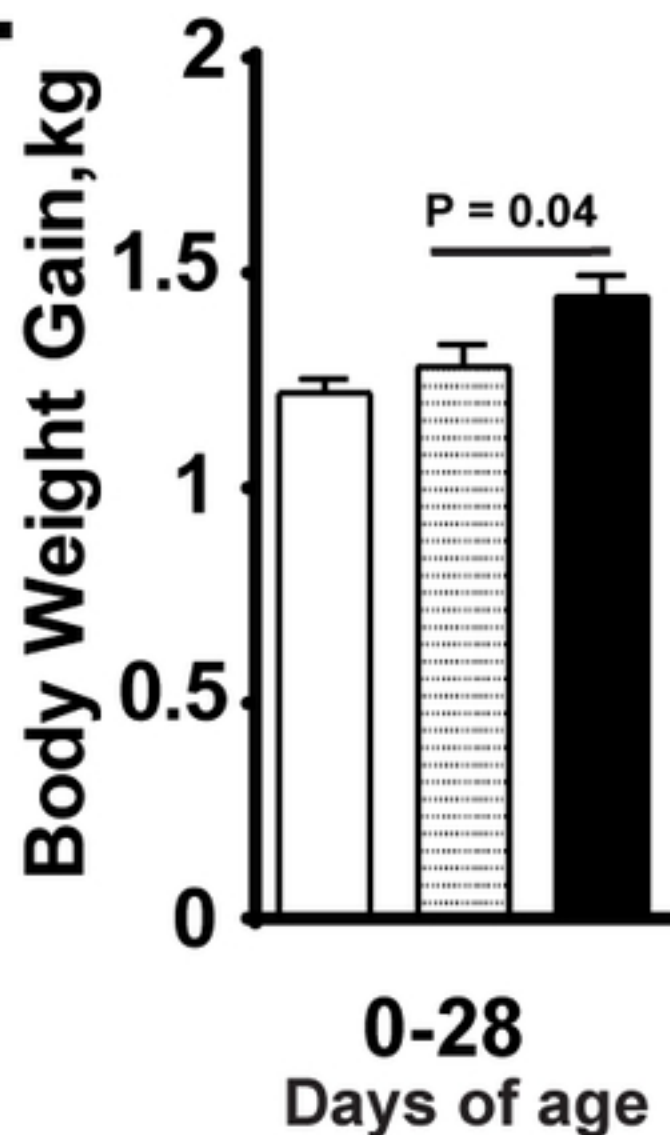

Figure 2

# Figure 3. DCA fails to inhibit *C. jejuni* *in vitro* growth

## A

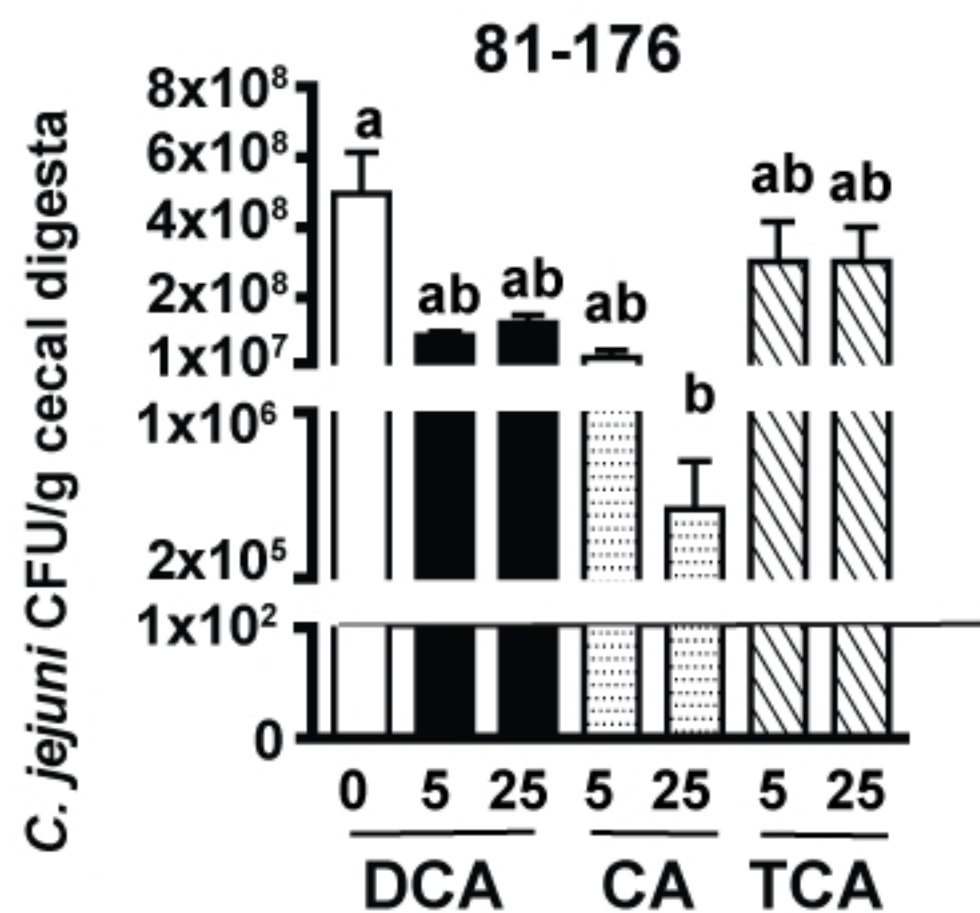

## B

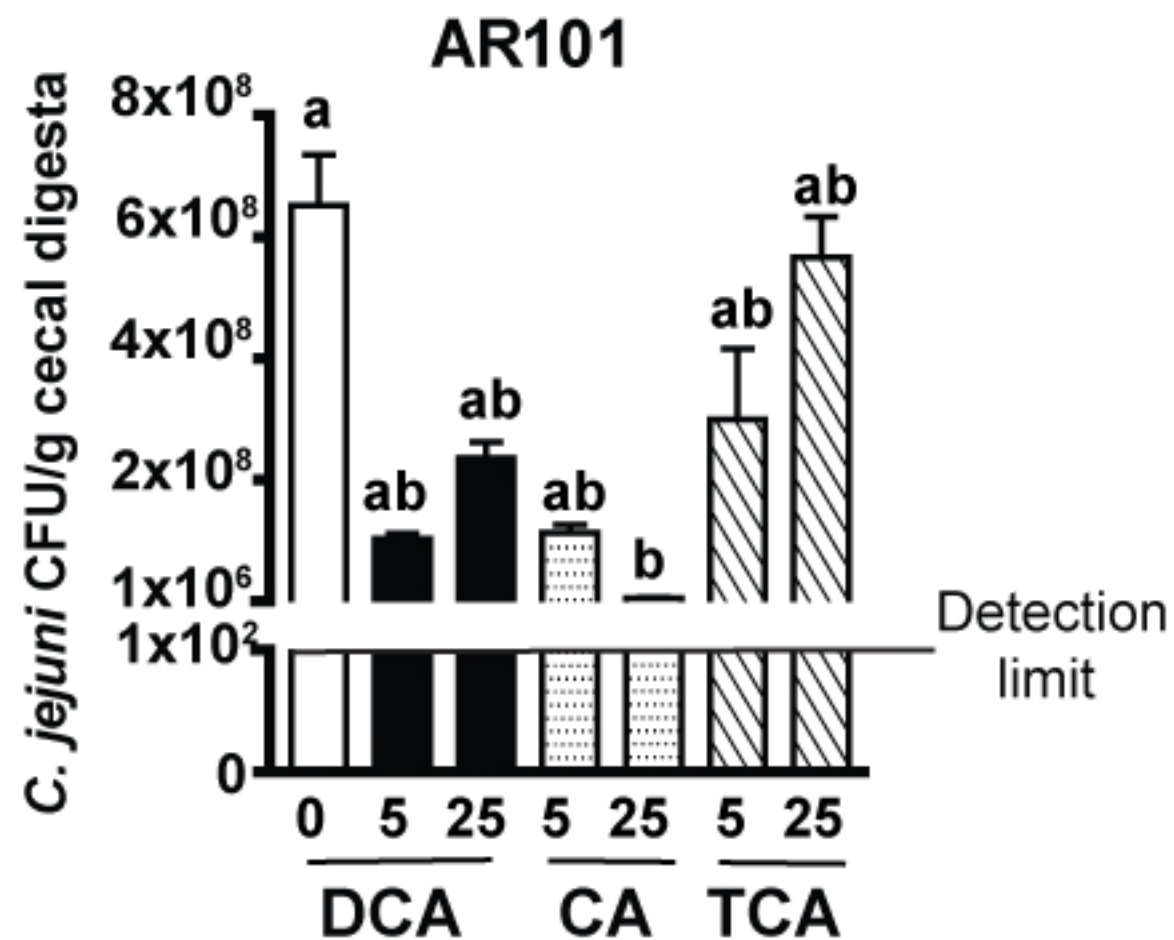

Figure 3

# Figure 4. LCA and UDCA fail to prevent *C. jejuni* colonization in chickens

bioRxiv preprint doi: <https://doi.org/10.1101/584284>; this version posted March 22, 2020. The copyright holder for this preprint (which was not certified by peer review) is the author/funder, who has granted bioRxiv a license to display the preprint in perpetuity. It is made available under aCC-BY 4.0 International license.

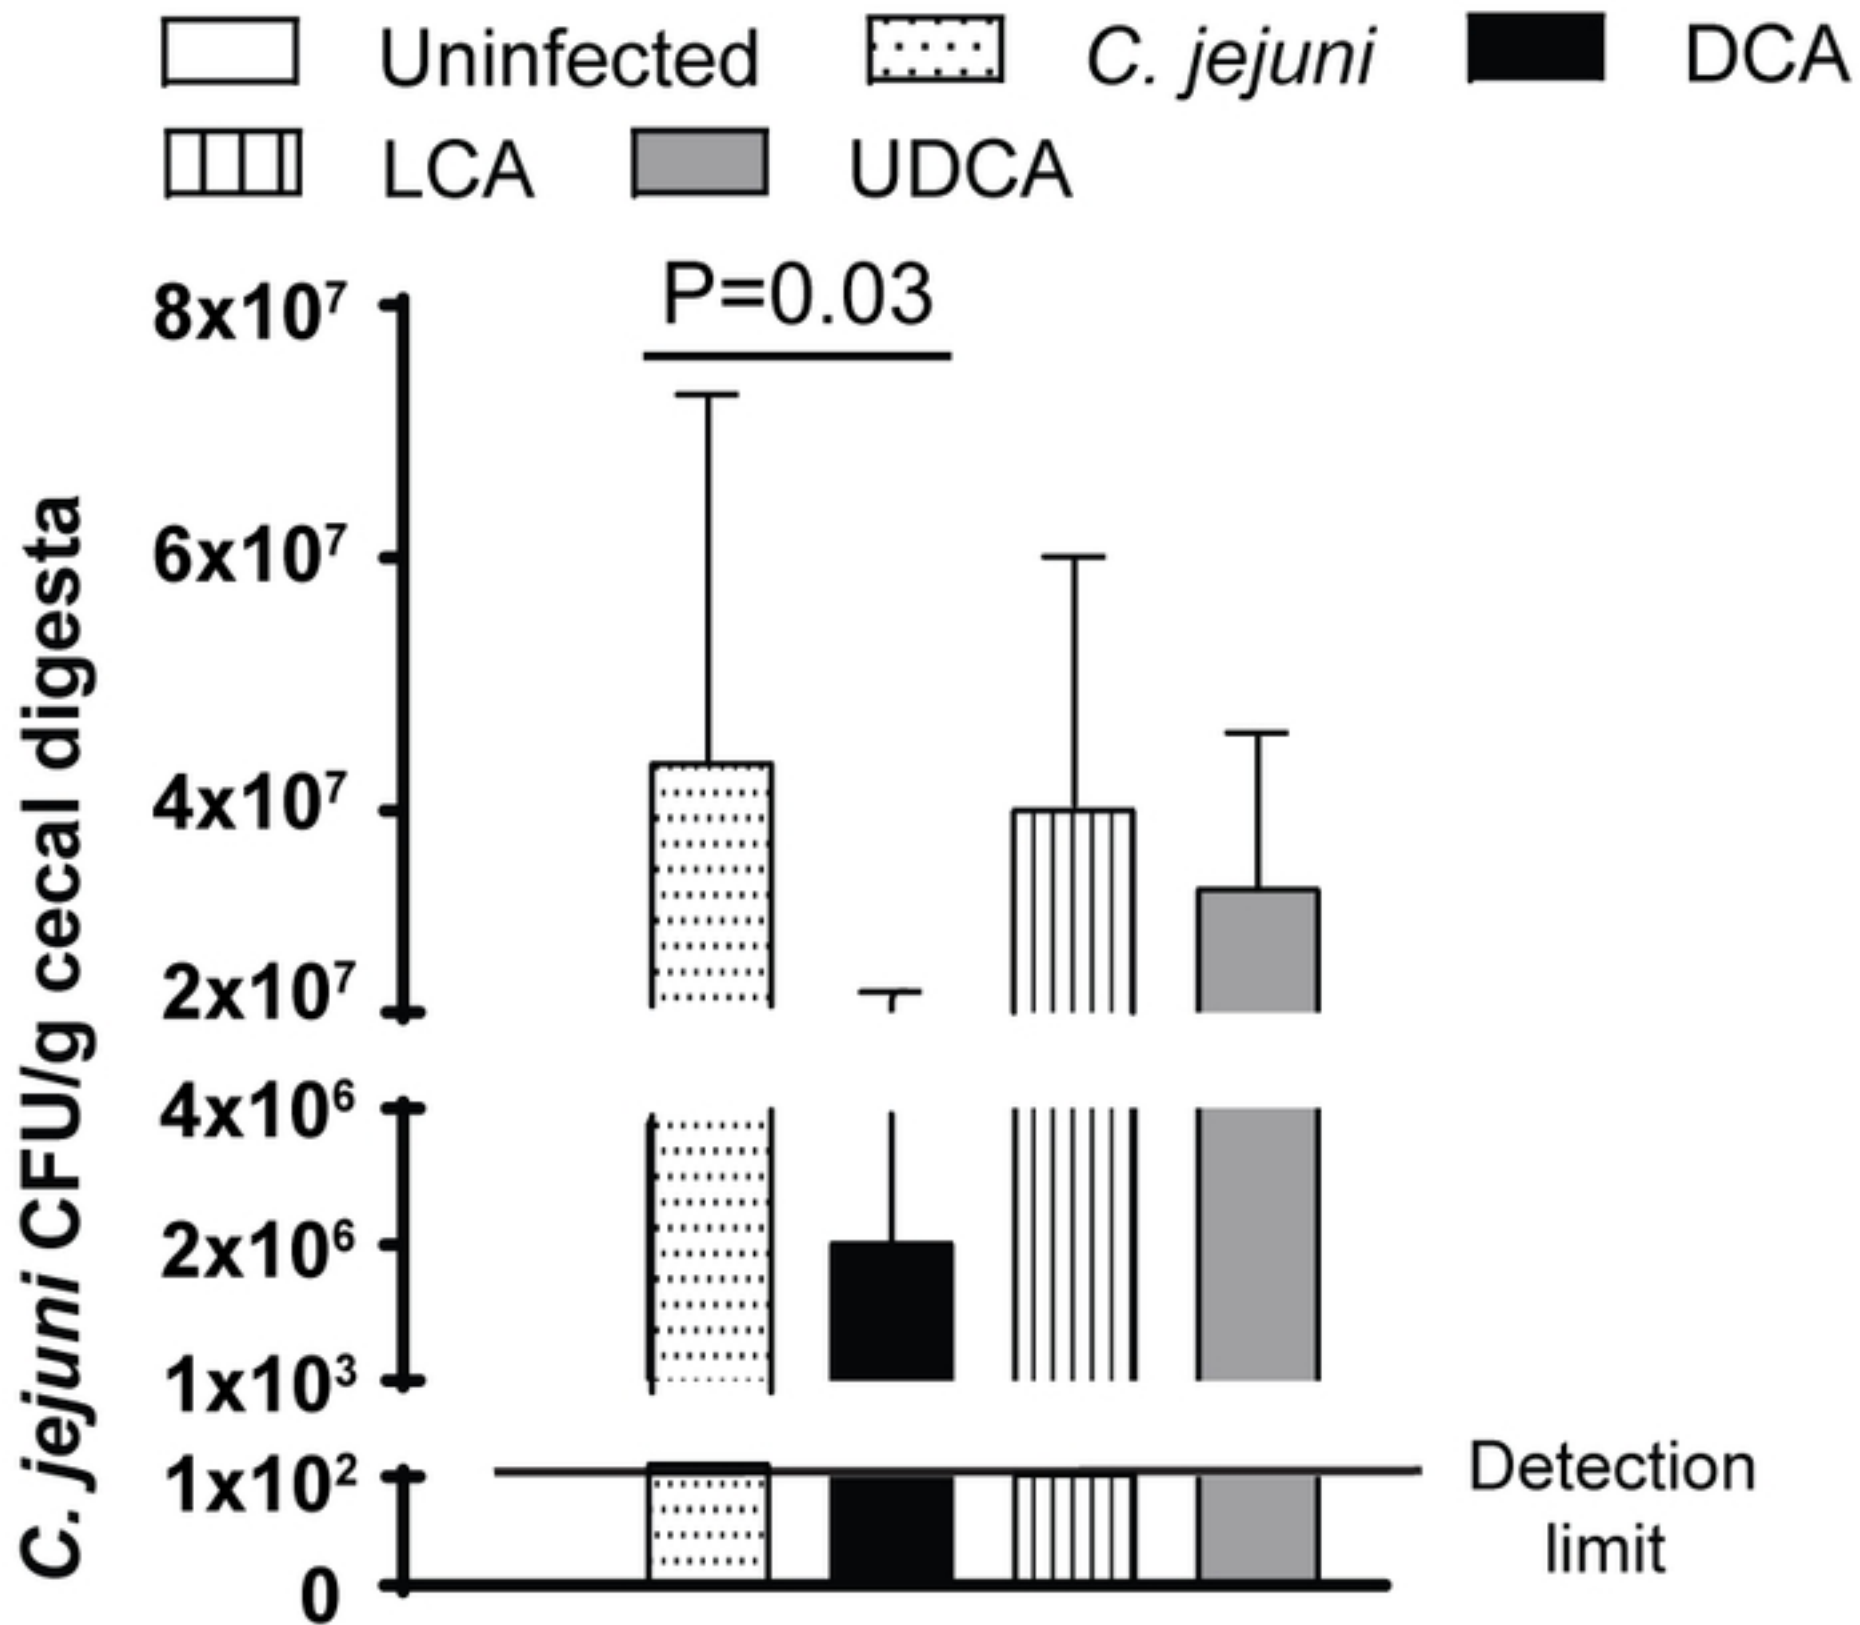

Figure 4

# Figure 5: DCA modulates cecal microbiota

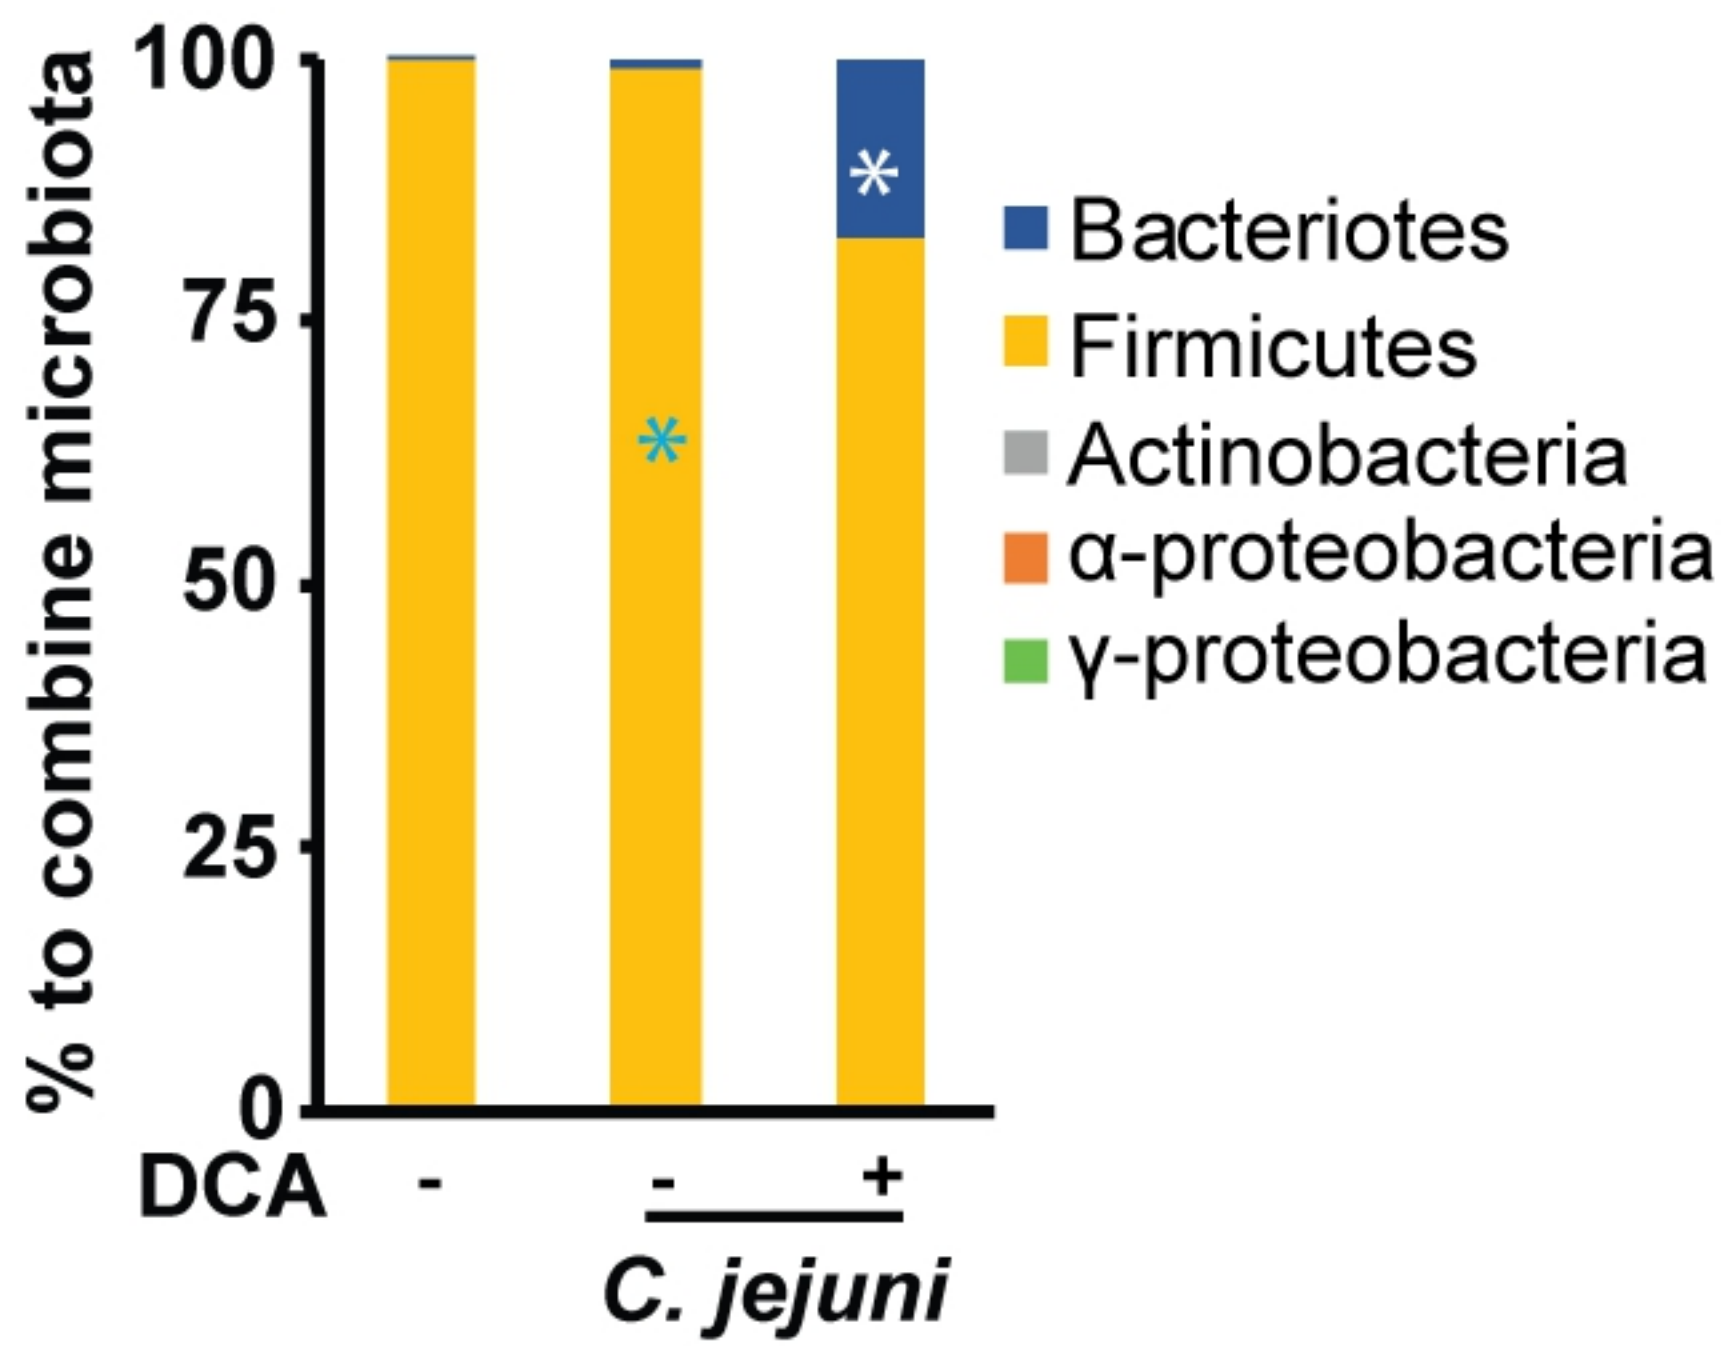

Figure 5

# Figure 6. DCA-modulated microbiota attenuates *C. jejuni* colonization in chickens

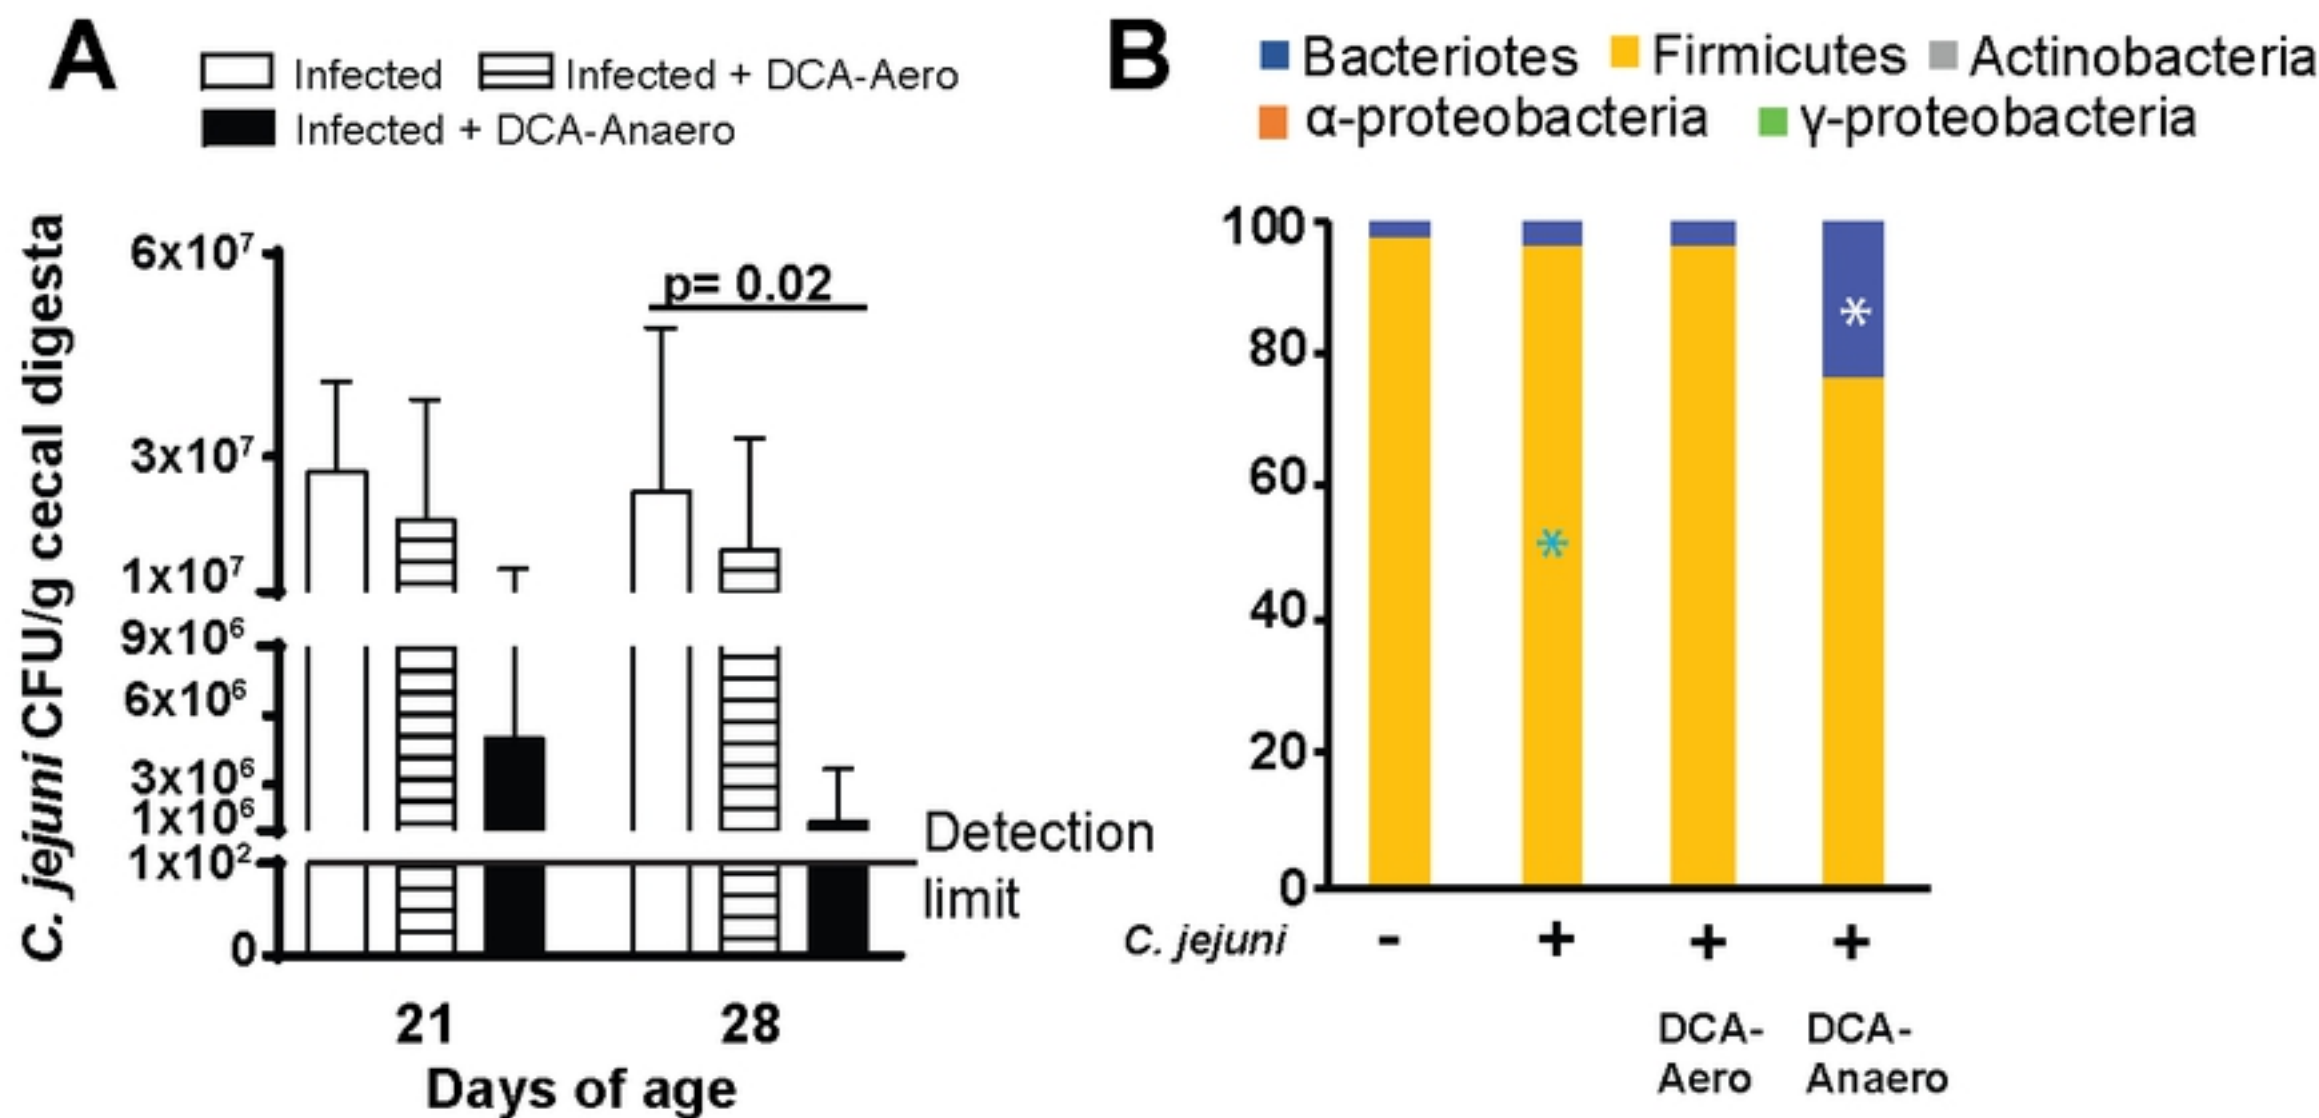

Figure 6



# Supple Figure 1. Chicken ages of infection don't influence the bacterial colonization levels

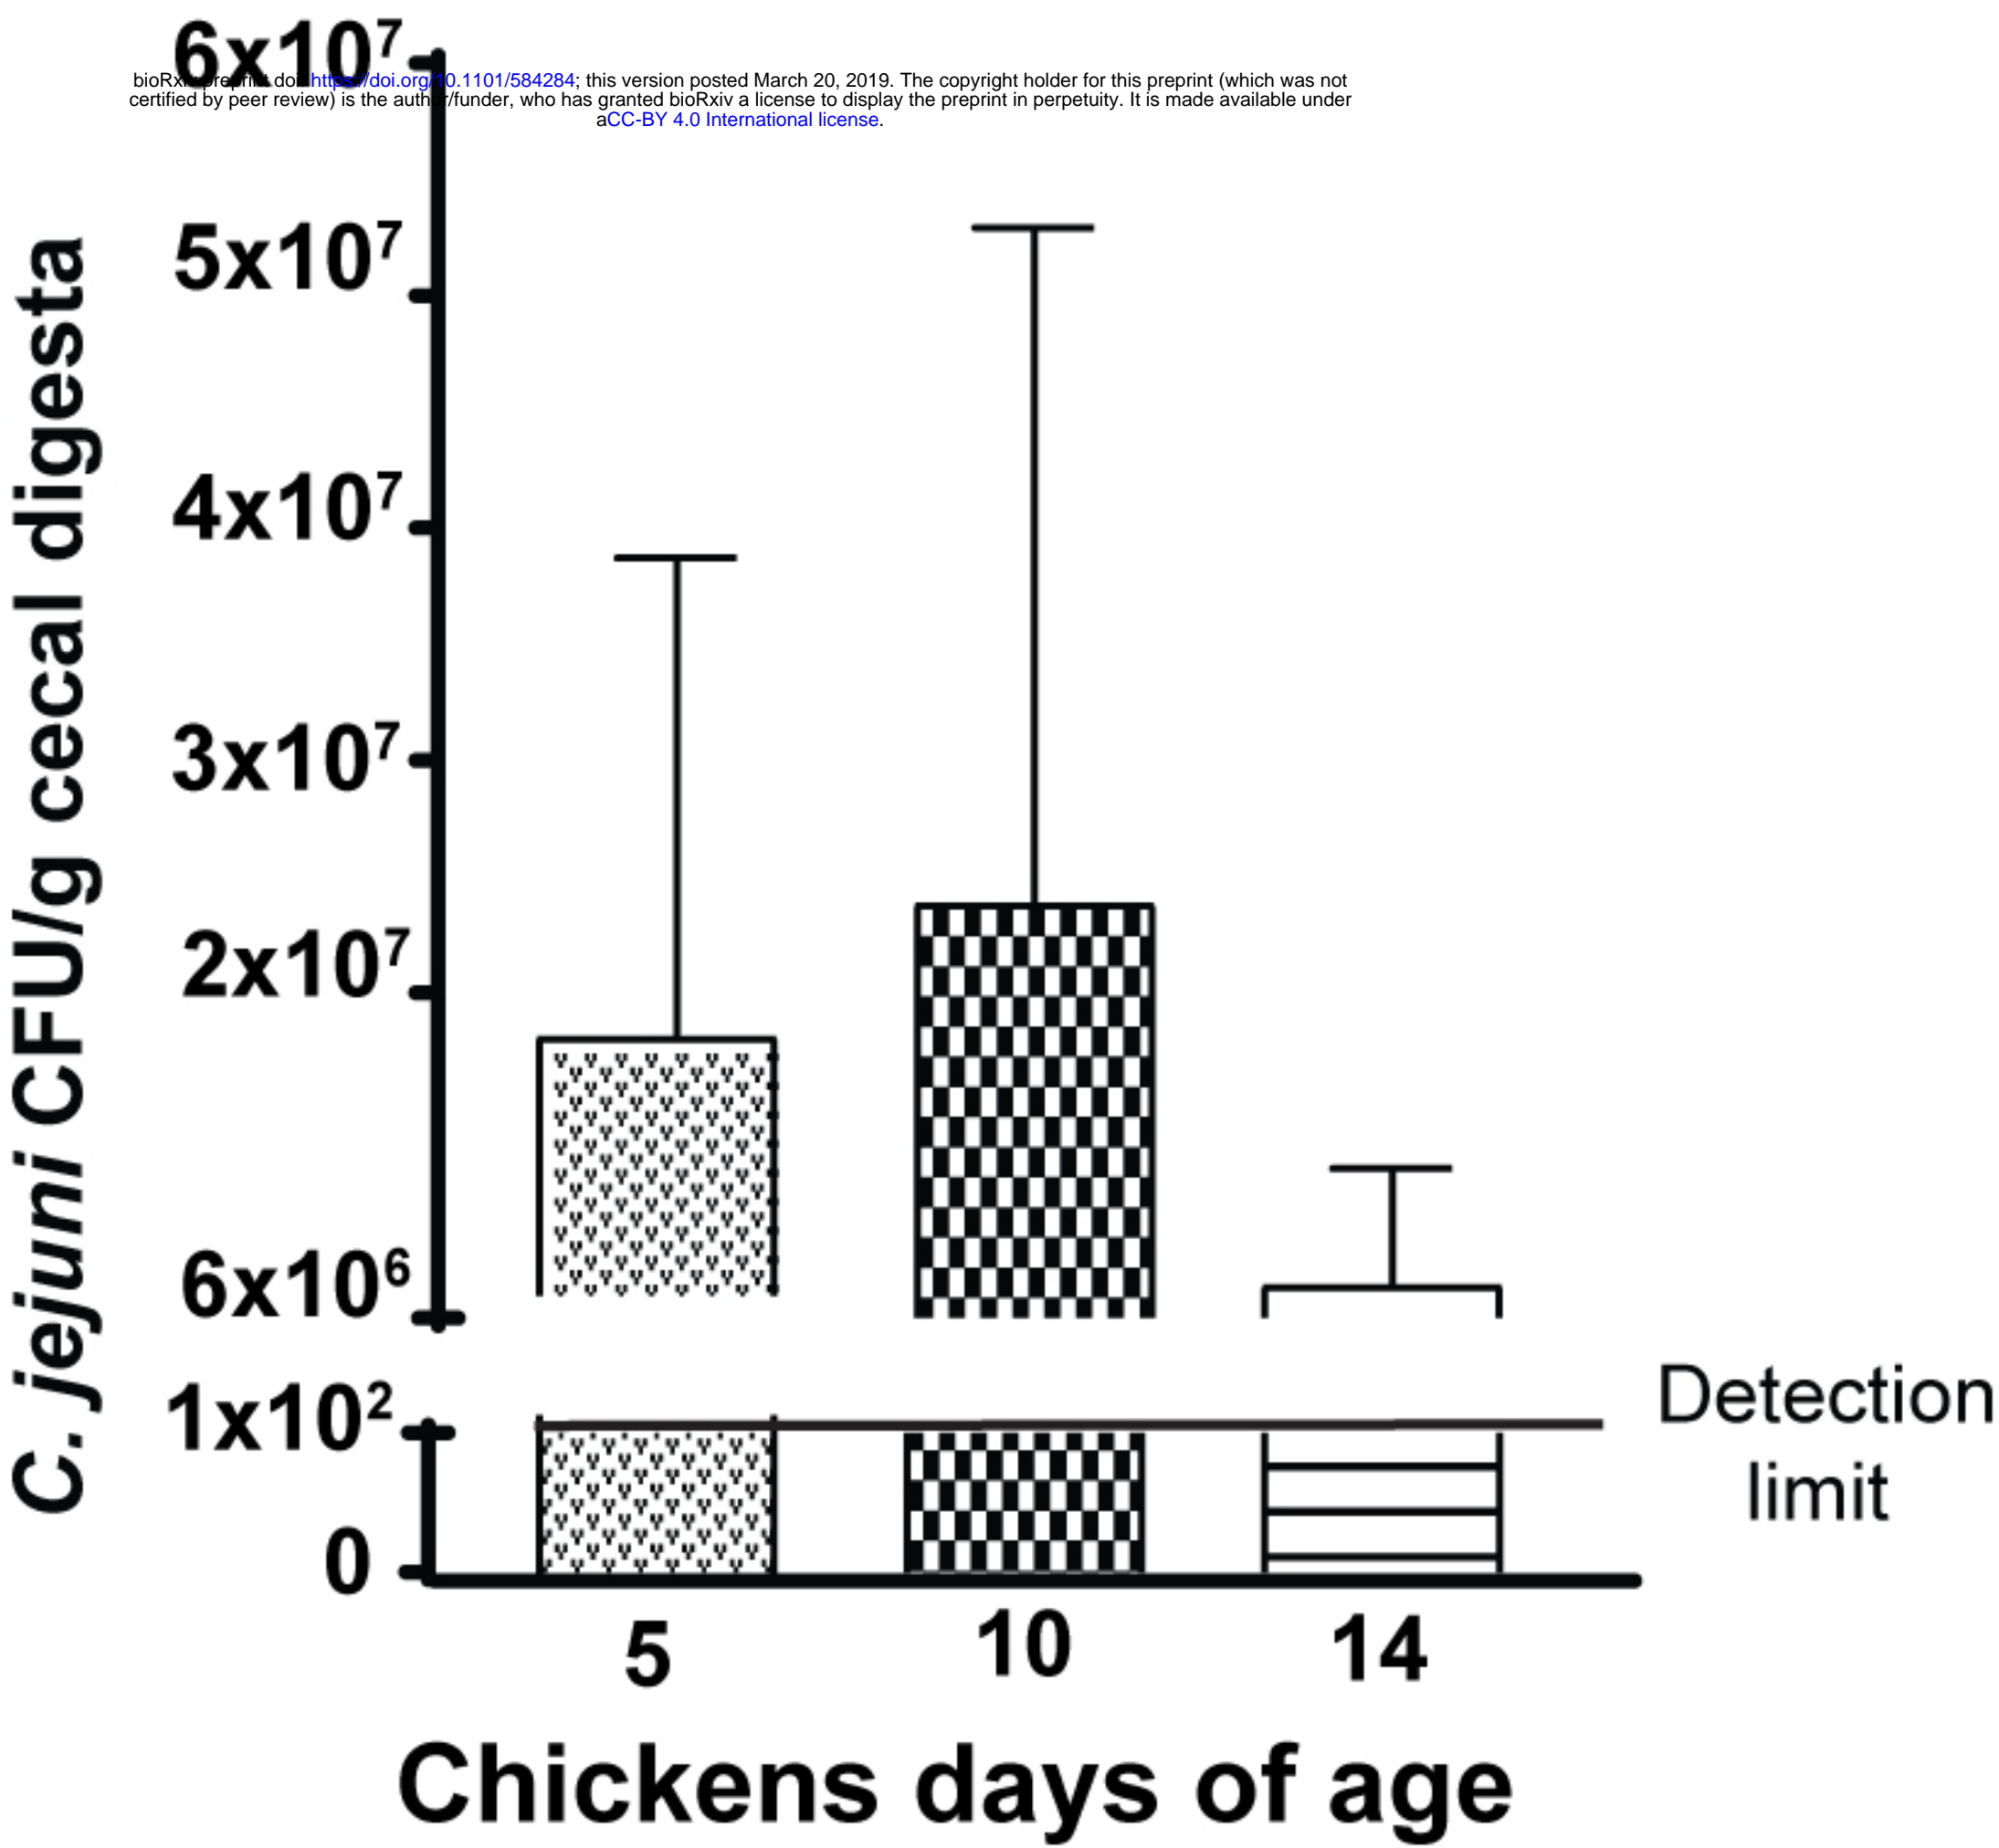

Source: http://biorxiv.org/content/10.1101/584284v1.full.pdf
